# Supplementary material for: Changes in the global burden of polycystic ovary syndrome from 1990 to 2021
Source: Research Square preprint supplement (doi:10.21203/rs.3.rs-5823228/v1), 2025-01-17
Supplement: Supplementary file 1 [file 3afa06a9b5f9b062a0eeea34.xlsx]

## Sheet: table 1
Table 1 Burden of PCOS, 1990–2021, by Global Burden of Disease study region.
Location	Numbers(95% UI)				Age-standardized rate(per 100 000)(95% UI)
	1990	2021	percentage change 1990-2021(%)		1990	2021	percentage change 1990-2021(%)
Global
Incidence	1476225.3 (1057983.5, 2045276.9)	2301505.6 (1655989.2, 3167177.8)	55.9 (51.62, 60.11)		24.2 (17.4, 33.5)	30.7 (22.1, 42.4)	26.77 (23.87, 29.7)
Prevalence	36651157.2 (26227943.2, 50603929.8)	69473252.4 (49531420, 95724479.2)	89.55 (85.03, 94.22)		676.8 (485.5, 932.6)	867.7 (618.7, 1195.3)	28.21 (25.21, 31.27)
DALYs	323798.6 (144342.1, 675926.8)	607756.9 (272745.2, 1268607.2)	87.7 (82.87, 92.43)		6 (2.7, 12.4)	7.6 (3.4, 15.9)	27.58 (24.23, 30.92)
SDI region
Low SDI
Incidence	9836.5 (4213.8, 20814.4)	205458.3 (144223.9, 291379.8)	232.02 (218.67, 247.71)		9.9 (7.2, 13.9)	13.8 (9.8, 19.3)	38.67 (32.84, 44.94)
Prevalence	1121931 (784807, 1611458.4)	3938251.3 (2745129.9, 5589751.2)	251.02 (236.82, 268.69)		252.4 (178.4, 359.2)	361.6 (255.3, 509.8)	43.23 (37.5, 50.28)
DALYs	9836.5 (4213.8, 20814.4)	34425.2 (14799.7, 72773.1)	249.97 (234.59, 268.42)		2.2 (0.9, 4.7)	3.1 (1.4, 6.6)	43.08 (36.76, 50.38)
Low-middle SDI
Incidence	209333.5 (148000.1, 293837.3)	481689 (338285.7, 670310.3)	130.11 (121.91, 140.99)		14.4 (10.4, 20)	22.1 (15.5, 30.7)	53.18 (47.29, 59.46)
Prevalence	4094311.3 (2868780.9, 5765430.7)	12118405.4 (8434181, 17027257.3)	195.98 (184.92, 209.49)		368.3 (260.4, 514.5)	592.4 (413, 831.8)	60.83 (54.5, 68.32)
DALYs	36511.8 (15811.4, 76977.5)	106509.7 (46621.4, 223924.9)	191.71 (180.2, 205.95)		3.3 (1.4, 6.8)	5.2 (2.3, 10.9)	59.32 (53.04, 67.07)
Middle SDI
Incidence	505653.9 (359588, 703114.3)	812669 (572963.7, 1126099.7)	60.72 (54.21, 68.04)		23.8 (16.9, 33.1)	37.2 (26.2, 51.8)	56.46 (50.38, 63.04)
Prevalence	10580143.2 (7410905.3, 14674450.8)	24613369.9 (17452531.6, 34074253.7)	132.64 (123.22, 142.88)		576.7 (404.4, 798.9)	970.2 (687.2, 1340.9)	68.24 (61.4, 76.16)
DALYs	93350.2 (41377, 195580.3)	214898.8 (95592.6, 450661.8)	130.21 (120.7, 140.81)		5.1 (2.2, 10.7)	8.5 (3.8, 17.8)	67.85 (61.12, 75.67)
High-middle SDI
Incidence	261030.5 (187118.7, 358760.3)	305810 (216061.4, 424907.9)	17.15 (12.65, 21.25)		24.2 (17.3, 33.5)	34.5 (24.3, 48.3)	42.71 (38, 47.09)
Prevalence	7047030 (4981606.3, 9727416.6)	11180894.9 (7874794.9, 15590881.4)	58.66 (53.33, 64.9)		621.7 (439.3, 859.5)	877.5 (616.7, 1221.5)	41.15 (36.51, 45.95)
DALYs	61793.6 (27718.6, 128454.5)	97184.5 (43255.1, 205403.8)	57.27 (51.09, 63.33)		5.4 (2.4, 11.3)	7.7 (3.4, 16.1)	41.14 (36.19, 45.99)
High SDI
Incidence	437301.5 (319330.7, 606631.9)	494212.2 (367071.5, 670948)	13.01 (6.88, 20.28)		58.8 (43, 81.4)	70.2 (52, 95.3)	19.41 (13.48, 27.17)
Prevalence	13783058.5 (10021809.4, 19223038.3)	17573919.8 (12981150.8, 23876520.6)	27.5 (21.32, 36.14)		1479.8 (1075.7, 2053.4)	1720.7 (1270.5, 2331.7)	16.28 (10.89, 23.54)
DALYs	122087.1 (55322.3, 254195)	154313.3 (70664.1, 314967.1)	26.4 (20.26, 34.33)		13.1 (5.9, 27.2)	15.2 (7, 31)	15.78 (10.54, 22.67)
21 GBD region
Andean Latin America
Incidence	25250.9 (17294.5, 36023.1)	42634.6 (29473.4, 60429.4)	68.84 (55.92, 84.57)		50 (34.4, 71)	64.7 (44.7, 91.9)	29.35 (19.52, 42.37)
Prevalence	466365.8 (322494, 653112.7)	1172864.5 (808337.4, 1649165.9)	151.49 (129.79, 175.33)		1230.4 (850.9, 1717.8)	1662.5 (1148.2, 2338.2)	35.12 (24.02, 47.98)
DALYs	4055.9 (1797.3, 8748.4)	10129.2 (4423.9, 21176.6)	149.74 (127.53, 174.94)		10.7 (4.8, 23)	14.4 (6.3, 30)	34.49 (22.66, 48.5)
Australasia
Incidence	15948.7 (11745.5, 20802.4)	21492.9 (15427.9, 29606.8)	34.76 (16.73, 55.55)		85 (62.2, 112.1)	98.2 (70.4, 135.4)	15.5 (0.97, 33.08)
Prevalence	444239.3 (326487.4, 585953.2)	701618 (500341, 974913)	57.94 (38.59, 81.58)		2049.9 (1505.7, 2710)	2387 (1708.4, 3297.5)	16.44 (2.35, 33.44)
DALYs	3873.5 (1763.7, 8060.7)	6103.6 (2756.5, 12632.8)	57.57 (38.47, 79.48)		17.9 (8.1, 37.2)	20.8 (9.3, 43)	16.39 (2.6, 32.87)
Caribbean
Incidence	1979.8 (867.3, 4095.2)	11962.5 (8144.4, 16730.1)	29.65 (22.74, 36.69)		22.2 (15.2, 31.3)	27.4 (18.6, 38.6)	29.65 (22.74, 36.69)
Prevalence	222432.4 (149139.1, 319229.7)	360981.8 (245137.3, 520033.5)	62.29 (53.64, 71.43)		605.7 (408.2, 869.3)	746.2 (506.3, 1073.5)	62.29 (53.64, 71.43)
DALYs	1979.8 (867.3, 4095.2)	3161.5 (1381.5, 6647.6)	59.69 (50.73, 69)		5.4 (2.3, 11.1)	6.5 (2.9, 13.7)	59.69 (50.73, 69)
Central Asia
Incidence	5347.8 (3686.1, 7702.4)	8122.3 (5654.1, 11355.5)	51.88 (40.1, 63.3)		6.8 (4.7, 9.7)	9.1 (6.3, 12.7)	34.83 (24.32, 44.09)
Prevalence	118817.9 (79820.2, 174950)	237958.9 (163368.4, 333464.7)	100.27 (84.89, 113.88)		175.7 (118.4, 257.8)	240.5 (164.6, 337.3)	36.84 (26.9, 46.84)
DALYs	1049.1 (438.1, 2236.9)	2079.4 (886.9, 4469.5)	98.2 (82.36, 113.87)		1.5 (0.6, 3.3)	2.1 (0.9, 4.5)	36.39 (26.18, 47.74)
Central Europe
Incidence	4244.9 (2905.8, 6223.9)	3175.5 (2221.1, 4441)	-25.19 (-32.84, -16.46)		3.6 (2.5, 5.3)	4.3 (3, 6.1)	20.88 (9.32, 33.99)
Prevalence	116152 (76721, 173921.5)	119149.2 (82050.4, 168514)	2.58 (-8.58, 14.75)		91.9 (60.8, 137.8)	111.7 (77, 159.2)	21.52 (8.7, 35.59)
DALYs	1014.7 (425.9, 2088.9)	1032.7 (442.9, 2156.6)	1.77 (-9.68, 15.06)		0.8 (0.3, 1.7)	1 (0.4, 2)	21.11 (8.12, 36.15)
Central Latin America
Incidence	119114.9 (81948.2, 168844.6)	143013.7 (100629.4, 200290.7)	20.06 (15.38, 25.42)		53.7 (37, 75.9)	57.2 (40, 80)	6.46 (2.69, 10.37)
Prevalence	2295522 (1578370.6, 3199568.8)	4072957.2 (2852240.6, 5662452.4)	77.43 (70.23, 84.75)		1382.5 (952.5, 1915.8)	1518.7 (1063, 2110.8)	9.85 (5.86, 14.43)
DALYs	20163.7 (9003.8, 42043)	35314.1 (15577.8, 73735.7)	75.14 (66.72, 83.06)		12.1 (5.4, 25.3)	13.2 (5.8, 27.5)	8.99 (4.69, 13.73)
Central Sub-Saharan Africa
Incidence	6063 (4247.4, 8685.3)	23871.9 (16637.7, 33976)	293.73 (259.69, 332.63)		8.8 (6.3, 12.4)	13 (9.2, 18.4)	48.2 (35.82, 62.24
Prevalence	110521.9 (76168.2, 160819.7)	444120.8 (305191.6, 640542)	301.84 (267.24, 341.66)		226.9 (157.8, 329.5)	337.7 (233.3, 485.4)	48.83 (36.5, 63.04)
DALYs	958.3 (406.3, 1975.2)	3861.9 (1673.7, 7930.5)	303.01 (261.05, 353.15)		1.9 (0.8, 4.1)	2.9 (1.3, 6)	49.6 (34.85, 67.72)
East Asia
Incidence	218485.8 (154343.7, 301132.9)	268458.5 (190157.1, 373877.4)	22.87 (10.26, 35.34)		15.6 (11.1, 21.8)	27.3 (19.2, 38.4)	75.02 (62.37, 86.34)
Prevalence	5607180.9 (3957250.2, 7863221.6)	10490358.5 (7423407.5, 14808757.1)	87.09 (75.09, 98.72)		408.1 (290, 572.2)	740.8 (519.6, 1039.3)	81.5 (70.23, 93.05)
DALYs	48225.9 (20818.6, 100143)	89991.4 (39441.8, 185701.9)	86.6 (74.68, 98.29)		3.5 (1.5, 7.3)	6.4 (2.8, 13.2)	82.86 (71.06, 94.3)
Eastern Europe
Incidence	8328.3 (5913.3, 11639.2)	7596.1 (5457.5, 10592.6)	-8.79 (-13.5, -4.38)		4.2 (3, 5.9)	5.3 (3.7, 7.5)	25.78 (19.64, 31.1)
Prevalence	237422.1 (160523.3, 339244.5)	265678.7 (185374.4, 381763)	11.9 (6.13, 16.8)		103.8 (70, 149.6)	132.4 (91.2, 190.5)	27.48 (21, 33.15)
DALYs	2097.7 (868.6, 4466.8)	2323.7 (970, 4890.4)	10.77 (4.82, 17.26)		0.9 (0.4, 2)	1.2 (0.5, 2.5)	27.16 (20.16, 34.26)
Eastern Sub-Saharan Africa
Incidence	25902 (18214, 36986.2)	76605.1 (53945.1, 108540.5)	195.75 (184.89, 208.9)		10.4 (7.5, 14.6)	13.1 (9.3, 18.4)	25.75 (20.85, 30.88)
Prevalence	448071 (310256.9, 646236.2)	1438942.4 (1001296.8, 2063339.5)	221.14 (209.9, 235.3)		266.9 (188.2, 383.1)	342.7 (242, 486.2)	28.38 (23.73, 34.2)
DALYs	3903.3 (1645.1, 8198.6)	12497.1 (5380.7, 26310.2)	220.17 (206.43, 236.52)		2.3 (1, 4.9)	3 (1.3, 6.2)	28.27 (22.86, 34.73)
High-income Asia Pacific
Incidence	158931.2 (111210.6, 226424.2)	107170.5 (75693.7, 152114.3)	-32.57 (-35.81, -28.32)		94 (66.9, 131)	109.2 (77.9, 153.9)	16.15 (9.46, 22.97)
Prevalence	4402355.4 (3172199.1, 6106156.6)	4104982.7 (2922772.6, 5775182.1)	-6.75 (-12.08, -1.5)		2341.7 (1690.8, 3246.4)	2544.9 (1836.1, 3551.3)	8.68 (3.25, 14.63)
DALYs	38274.5 (16930.4, 77128.8)	35520.5 (16037.3, 72064.2)	-7.2 (-12.48, -2.08)		20.4 (9, 41.1)	22.2 (10.1, 45.2)	8.61 (3.18, 14.44)
High-income North America
Incidence	134112.7 (94940.5, 187144.2)	203413.5 (150004.6, 271137.8)	51.67 (33.11, 83.31)		58.1 (40.9, 81.3)	73.2 (54.4, 96.6)	25.96 (10.83, 51.64)
Prevalence	4469583.7 (3157929.6, 6274672.9)	6362238.3 (4742961.9, 8324162.2)	42.35 (25.45, 68.36)		1483.6 (1046.5, 2088.2)	1855.7 (1382.3, 2426.4)	25.09 (10.41, 47.53)
DALYs	39976.1 (17688.8, 82638.3)	56162.2 (25718.3, 113710.2)	40.49 (24.03, 65.39)		13.3 (5.9, 27.3)	16.4 (7.6, 33.3)	23.85 (9.45, 45.29)
North Africa and Middle East
Incidence	128593.5 (88937.3, 183308.6)	242427.1 (171058.1, 342784.6)	88.52 (79.82, 98.46)		28.7 (20.1, 40.6)	37.3 (26.3, 52.8)	29.73 (23.43, 35.91)
Prevalence	2463301.1 (1707181.3, 3501813.4)	6673431.5 (4672056.3, 9434543.5)	170.91 (157.81, 185)		754.3 (523, 1071.5)	990.2 (693.3, 1399.1)	31.28 (24.31, 37.86)
DALYs	22386.5 (9812.9, 47102.6)	59116.3 (26476.8, 125706.8)	164.07 (148.49, 178.24)		6.8 (3, 14.3)	8.8 (3.9, 18.7)	29.13 (21.62, 36.66)
Oceania
Incidence	2013.1 (1401.2, 2847)	5300.9 (3692.1, 7439.8)	163.31 (136.75, 185.25)		23.8 (16.7, 33.5)	32.9 (23, 46.3)	38.56 (25.1, 50.15)
Prevalence	40226.7 (27505, 56891.6)	124484.3 (86570.2, 177516.4)	209.46 (178.55, 236.12)		621.1 (428.1, 873.4)	870.3 (605, 1243.3)	40.12 (26.55, 52.1)
DALYs	352.2 (160.6, 738.9)	1083.5 (471.3, 2285.6)	207.65 (175.84, 238.86)		5.4 (2.5, 11.3)	7.6 (3.3, 15.9)	39.8 (26.15, 52.32)
South Asia
Incidence	162363.3 (116293.1, 226382.7)	416258.4 (299377.4, 573874.2)	156.37 (142.93, 175.38)		12.2 (8.8, 16.8)	20.3 (14.4, 28.1)	66.1 (56.5, 77.13)
Prevalence	3294301.2 (2344772, 4593824.8)	11291117.1 (7950085.9, 15832639.8)	242.75 (222.38, 269.54)		309.1 (222.4, 429.6)	557.8 (392.8, 781)	80.44 (69.61, 94.73)
DALYs	29342.1 (12824.1, 62333.8)	98946.9 (43231.5, 207059.2)	237.22 (215.88, 262.7)		2.7 (1.2, 5.8)	4.9 (2.1, 10.2)	78.54 (67.27, 91.55)
Southeast Asia
Incidence	174333.2 (122499, 243431.4)	357262.3 (254498.6, 495461.4)	185.64 (166.63, 205.02)		29.3 (20.6, 40.8)	53.6 (37.9, 74.9)	82.8 (69.3, 97.25)
Prevalence	3682948.8 (2589198.8, 5201509.9)	10520027.7 (7378813.9, 14809823.5)	185.64 (166.63, 205.02)		773.1 (546.2, 1094.3)	1404.1 (984.5, 1974.7)	81.61 (68.92, 94.86)
DALYs	32853.8 (14429.1, 66791.8)	92605.7 (41149, 191024.1)	181.87 (162.32, 202.42)		6.9 (3, 14)	12.4 (5.5, 25.5)	80.53 (68.47, 93.64)
Southern Latin America
Incidence	12429.8 (8602.2, 17727.2)	21574.4 (15329.6, 30970)	73.57 (59.28, 90.52)		23.3 (16.1, 33.3)	36.6 (25.9, 52.4)	57.18 (43.87, 72.8)
Prevalence	296321.5 (204840.7, 431020.1)	667604.8 (469021.5, 956761.4)	125.3 (107.55, 146.54)		600.5 (416.5, 874.7)	950.5 (666.4, 1360.4)	58.28 (46.09, 72.93)
DALYs	2627.8 (1179.4, 5421.3)	5893.5 (2574.8, 12247.5)	124.27 (104.79, 146.08)		5.3 (2.4, 11)	8.4 (3.7, 17.4)	58.03 (44.42, 74.12)
Southern Sub-Saharan Africa
Incidence	11799.7 (8261, 16787.8)	18377.8 (12888.4, 26038)	55.75 (48.83, 64.41)		17.2 (12.1, 24.3)	21 (14.7, 29.8)	22.06 (16.26, 27.85)
Prevalence	232808.6 (160575, 334631.4)	480389.6 (328945.2, 679589.3)	106.35 (96.18, 116.82)		449.2 (310.3, 643.1)	551.2 (377.3, 779.2)	22.7 (17.12, 29.22)
DALYs	2047.4 (881.8, 4435.2)	4157.7 (1795.1, 8746)	103.07 (92.15, 114.77)		3.9 (1.7, 8.5)	4.8 (2.1, 10)	21.67 (15.51, 28.58)
Tropical Latin America
Incidence	22284.6 (15199.8, 32004)	23769.1 (16611.4, 32960.1)	6.66 (-0.26, 13.5)		11.7 (8, 16.7)	12.3 (8.4, 17.2)	5 (0.43, 10.38)
Prevalence	448844.2 (304409, 647659.2)	746471.7 (514677, 1057462.8)	66.31 (57.21, 75.3)		283.9 (192.7, 407.2)	308.2 (211.9, 438.9)	8.56 (3.54, 14.09)
DALYs	4011.1 (1701.1, 8427.3)	6557.7 (2825.1, 13831)	63.49 (54.8, 72.88)		2.5 (1.1, 5.3)	2.7 (1.2, 5.7)	7.48 (2.5, 13.07)
Western Europe
Incidence	206740.9 (146330.9, 286172.1)	206192.2 (145653.5, 286689.1)	-0.27 (-3.7, 2.77)		69.9 (49.2, 97.8)	75.2 (53.1, 105)	7.56 (3.65, 10.89)
Prevalence	6815142.5 (4796290.8, 9455180.2)	7455929.3 (5232259.4, 10460556.8)	9.4 (5.38, 13.39)		1751.6 (1233.8, 2431.9)	1944.3 (1361.7, 2726.7)	11 (7.06, 14.84)
DALYs	60788.9 (27584.9, 126652.6)	66041.5 (29857.2, 136985.1)	8.64 (4.31, 12.51)		15.6 (7.1, 32.5)	17.3 (7.8, 35.9)	10.93 (6.72, 14.96)
Western Sub-Saharan Africa
Incidence	24710.3 (17219.7, 35159.5)	92826.2 (65226.5, 132560.9)	275.66 (259.12, 296.05)		10.3 (7.4, 14.4)	14.2 (10.1, 20)	37.15 (30.95, 44.42)
Prevalence	438598.3 (307139.7, 633877.8)	1741945.4 (1209889.2, 2493010.7)	297.16 (279.57, 319.43)		252.3 (177.7, 360.9)	378 (265.9, 537)	49.81 (43, 58.43)
DALYs	3816.2 (1629, 8015.4)	15176.8 (6521.5, 32235.9)	297.69 (279.03, 324.49)		2.2 (0.9, 4.6)	3.3 (1.4, 6.9)	50.04 (42.93, 60.11)
Age group（years）
15-19
Incidence	699967.4 (431670.5, 1111989.7)	1056349.2 (659123.1, 1642603.1)	50.91 (45.07, 56.21)		134.8 (83.1, 214.1)	169.3 (105.6, 263.2)	25.63 (20.76, 30.03)
Prevalence	4919456.3 (3335366.3, 7017527.9)	7663403.4 (5183309.6, 10971947.3)	55.78 (51.38, 61.25)		947.1 (642.1, 1351)	1228.1 (830.7, 1758.4)	29.67 (26.02, 34.23)
DALYs	44339.7 (19608.2, 93893.4)	68812.1 (30360.1, 145846.7)	55.19 (49.87, 61.89)		8.5 (3.8, 18.1)	11 (4.9, 23.4)	29.19 (24.75, 34.76)
20-24
Incidence	41811.4 (17487.9, 99989.8)	50237.3 (20473.9, 124736.4)	20.15 (13.68, 27.16)		8.5 (3.6, 20.3)	8.4 (3.4, 20.9)	-0.99 (-6.32, 4.79)
Prevalence	6348599.6 (4514512.4, 8839642.9)	10146098.6 (7311868.4, 13931506)	59.82 (55.45, 64.43)		1290.1 (917.4, 1796.4)	1699.1 (1224.4, 2333)	31.7 (28.1, 35.5)
DALYs	58564.1 (26050.4, 122606.2)	93151.4 (41704.7, 193793.4)	59.06 (53.75, 64.23)		11.9 (5.3, 24.9)	15.6 (7, 32.5)	31.07 (26.69, 35.33)
25-29
Incidence	21729.7 (11240.8, 39286.3)	29014.2 (14775.6, 53887.6)	33.52 (28.55, 39.68)		4.9 (2.5, 8.9)	4.9 (2.5, 9.2)	0.45 (-3.29, 5.09)
Prevalence	6031387.2 (4318569.1, 8444653.6)	10422751.7 (7483904, 14456356.8)	72.81 (68.01, 78.57)		1362.7 (975.7, 1907.9)	1771.5 (1272, 2457.1)	30.01 (26.4, 34.34)
DALYs	54546.1 (23758.2, 113009.4)	93527.1 (41177.5, 191945.3)	71.46 (65.44, 77.97)		12.3 (5.4, 25.5)	15.9 (7, 32.6)	29 (24.47, 33.89)
30-34
Incidence	10641.3 (4804.8, 17088.4)	17173.8 (7847.4, 27563.5)	61.39 (56.05, 66.33)		2.8 (1.2, 4.4)	2.8 (1.3, 4.6)	2.9 (-0.5, 6.05)
Prevalence	5370351.6 (3850998.3, 7479002.5)	10763002.8 (7711792.5, 14968296)	100.42 (95.02, 106.81)		1393.4 (999.2, 1940.5)	1780.5 (1275.8, 2476.2)	27.79 (24.35, 31.86)
DALYs	47000.7 (20894.2, 100837.7)	93268.5 (41091.2, 198717.1)	98.44 (91.98, 106.01)		12.2 (5.4, 26.2)	15.4 (6.8, 32.9)	26.53 (22.41, 31.35)
35-39
Incidence	7395.9 (3376.8, 12017.7)	12015 (5526.7, 19695)	62.45 (57.29, 67.49)		2.1 (1, 3.4)	2.1 (1, 3.5)	2.03 (-1.22, 5.19)
Prevalence	4926665.3 (3515124.3, 6836122.2)	10125830.5 (7189684, 14078426.7)	105.53 (99.98, 111.43)		1398.6 (997.9, 1940.7)	1805.4 (1281.9, 2510.1)	29.08 (25.6, 32.79)
DALYs	42192.9 (18612.1, 88156)	86164.3 (38070.1, 181214.5)	104.22 (98.29, 111.16)		12 (5.3, 25)	15.4 (6.8, 32.3)	28.25 (24.53, 32.62)
40-44
Incidence	3833.7 (1587.5, 6609.9)	6926.8 (2882.4, 11912.9)	80.68 (74.9, 87.04)		1.3 (0.6, 2.3)	1.4 (0.6, 2.4)	3.47 (0.16, 7.11)
Prevalence	4264970.2 (3079692.5, 5936549.8)	9147146.3 (6544589.1, 12706765.1)	114.47 (108.54, 120.26)		1488.7 (1075, 2072.2)	1828.5 (1308.3, 2540.1)	22.82 (19.43, 26.14)
DALYs	36292.5 (16202.1, 75930)	77515.1 (34496.4, 161821.6)	113.58 (107.08, 119.28)		12.7 (5.7, 26.5)	15.5 (6.9, 32.3)	22.31 (18.59, 25.58)
45-49
Incidence	1574.1 (335.1, 3224.8)	3358 (707.3, 6847.4)	113.33 (100.47, 121.99)		0.7 (0.1, 1.4)	0.7 (0.1, 1.4)	4.61 (-1.7, 8.86)
Prevalence	2945077.9 (2115796.3, 4066634.4)	7499319.7 (5414709.8, 10384919.5)	154.64 (148.12, 161.47)		1268.4 (911.2, 1751.4)	1583.8 (1143.5, 2193.2)	24.87 (21.67, 28.22)
DALYs	25008.4 (11280.9, 50070.8)	63606.7 (28676.8, 126845.9)	154.34 (147.24, 161.54)		10.8 (4.9, 21.6)	13.4 (6.1, 26.8)	24.72 (21.24, 28.25)
The table shows incident cases,prevalent cases,and Disability-Adjusted Life Years(DALYs) owing to PCOS in 1990 and 2021, and the percentage change, from 1990 to 2021, in the age-standardized rates (ASRs) per 100 000 women (generated from data available from http://ghdx.healthdata.org/gbd-results-tool).UI, uncertainty intervals.
