# Supplementary material for: Changes in the global burden of polycystic ovary syndrome from 1990 to 2021
Source: Research Square preprint supplement (doi:10.21203/rs.3.rs-5823228/v1), 2025-01-17
Supplement: Supplementary file 2 [file 3c4e74b6b065349340d5e2a5.xlsx]

## Sheet: Supplementary Table S1
Supplementary Table S1 Burden of PCOS among 204 countries and territories, 1990–2021, by Global Burden of Disease study.
Location	Numbers(95% UI)				Age-standardized rate(per 100 000)(95% UI)
	1990	2021	percentage change 1990-2021(%)		1990	2021	percentage change 1990-2021(%)
Global
Incidence	1476225.3 (1057983.5, 2045276.9)	2301505.6 (1655989.2, 3167177.8)	55.9 (51.62, 60.11)		24.2 (17.4, 33.5)	30.7 (22.1, 42.4)	26.77 (23.87, 29.7)
Prevalence	36651157.2 (26227943.2, 50603929.8)	69473252.4 (49531420, 95724479.2)	89.55 (85.03, 94.22)		676.8 (485.5, 932.6)	867.7 (618.7, 1195.3)	28.21 (25.21, 31.27)
DALYs	323798.6 (144342.1, 675926.8)	607756.9 (272745.2, 1268607.2)	87.7 (82.87, 92.43)		6 (2.7, 12.4)	7.6 (3.4, 15.9)	27.58 (24.23, 30.92)
High-income North America
Incidence	134112.7 (94940.5, 187144.2)	203413.5 (150004.6, 271137.8)	51.67 (33.11, 83.31)		58.1 (40.9, 81.3)	73.2 (54.4, 96.6)	25.96 (10.83, 51.64)
Prevalence	4469583.7 (3157929.6, 6274672.9)	6362238.3 (4742961.9, 8324162.2)	42.35 (25.45, 68.36)		1483.6 (1046.5, 2088.2)	1855.7 (1382.3, 2426.4)	25.09 (10.41, 47.53)
DALYs	39976.1 (17688.8, 82638.3)	56162.2 (25718.3, 113710.2)	40.49 (24.03, 65.39)		13.3 (5.9, 27.3)	16.4 (7.6, 33.3)	23.85 (9.45, 45.29)
Canada
Incidence	6250.6 (4352.4, 9019.4)	8840.8 (6149.5, 12717.3)	41.44 (26.14, 60.28)		27.9 (19.4, 40.2)	35.8 (24.9, 51.5)	28.23 (14.07, 44.52)
Prevalence	214191.6 (149040.7, 306250.7)	310637.3 (217280.1, 450465.3)	45.03 (29.54, 63.24)		716.4 (497.5, 1027.6)	915.2 (641.2, 1323)	27.74 (14.15, 43.85)
DALYs	1920.7 (848.1, 3954.7)	2769.4 (1177.8, 5631.6)	44.19 (27.55, 61.69)		6.4 (2.8, 13.2)	8.2 (3.5, 16.5)	27.33 (13.08, 43.23)
Greenland
Incidence	10.5 (7.4, 14.7)	13.9 (9.8, 20)	32.55 (18.88, 45.08)		23.5 (16.6, 33)	32.2 (22.7, 46.1)	37.15 (23.25, 50.06)
Prevalence	370.4 (257.7, 520.5)	426.3 (298.3, 604.7)	15.07 (4.38, 25.1)		539.5 (374.9, 758.5)	783.8 (551.7, 1110.3)	45.28 (32.2, 58.52)
DALYs	3.3 (1.4, 6.8)	3.8 (1.7, 8.1)	14.15 (2.15, 26.38)		4.8 (2.1, 9.9)	7 (3.1, 14.9)	44.88 (29.19, 59.88)
United States of America
Incidence	127848.5 (90504, 178310.7)	194555.5 (142842.7, 258038.3)	52.18 (33.13, 85.59)		61.3 (43.2, 85.9)	76.8 (57.1, 100.9)	25.27 (10.12, 52.06)
Prevalence	4254919.1 (3008393.8, 5969707)	6051074.9 (4526937.1, 7901919.8)	42.21 (24.68, 69.41)		1568 (1107.3, 2207)	1958.7 (1463.5, 2556.9)	24.92 (9.41, 48.4)
DALYs	38051.1 (16838.4, 78573.6)	53388.1 (24521.8, 107618.8)	40.31 (23.07, 66.2)		14 (6.2, 28.8)	17.3 (8, 34.9)	23.64 (8.83, 45.92)
Australasia
Incidence	15948.7 (11745.5, 20802.4)	21492.9 (15427.9, 29606.8)	34.76 (16.73, 55.55)		85 (62.2, 112.1)	98.2 (70.4, 135.4)	15.5 (0.97, 33.08)
Prevalence	444239.3 (326487.4, 585953.2)	701618 (500341, 974913)	57.94 (38.59, 81.58)		2049.9 (1505.7, 2710)	2387 (1708.4, 3297.5)	16.44 (2.35, 33.44)
DALYs	3873.5 (1763.7, 8060.7)	6103.6 (2756.5, 12632.8)	57.57 (38.47, 79.48)		17.9 (8.1, 37.2)	20.8 (9.3, 43)	16.39 (2.6, 32.87)
Australia
Incidence	12161.8 (9033.9, 15714.2)	17111 (12186.8, 23869.2)	40.69 (16.52, 68.84)		78.4 (57.6, 101.9)	94.8 (67.4, 132.4)	20.87 (1.44, 44.51)
Prevalence	342565.4 (251262.1, 445958.4)	563727 (398303.5, 791359.9)	64.56 (39.12, 94.99)		1896.3 (1390.8, 2464.1)	2305 (1633.5, 3213.9)	21.55 (2.57, 44.2)
DALYs	2988.9 (1343.9, 6110)	4904.3 (2199.3, 10306.4)	64.09 (38.44, 93)		16.6 (7.5, 33.9)	20.1 (9, 41.8)	21.43 (2.57, 42.86)
New Zealand
Incidence	3786.9 (2664.8, 5331.5)	4381.9 (3113.9, 6041.8)	15.71 (0.92, 30.83)		116.2 (80.8, 166)	114.6 (81.2, 158.4)	-1.39 (-14.34, 10.98)
Prevalence	101673.9 (71598.5, 142499.1)	137891 (99422.3, 187997.8)	35.62 (17.64, 51.07)		2812.9 (1980.1, 3948.6)	2789.7 (2008.7, 3805.9)	-0.82 (-13.79, 10.35)
DALYs	884.7 (393.5, 1817.1)	1199.2 (550.7, 2502.8)	35.56 (18.66, 50.63)		24.5 (10.9, 50.2)	24.3 (11.1, 50.6)	-0.74 (-12.75, 10.31)
High-income Asia Pacific
Incidence	158931.2 (111210.6, 226424.2)	107170.5 (75693.7, 152114.3)	-32.57 (-35.81, -28.32)		94 (66.9, 131)	109.2 (77.9, 153.9)	16.15 (9.46, 22.97)
Prevalence	4402355.4 (3172199.1, 6106156.6)	4104982.7 (2922772.6, 5775182.1)	-6.75 (-12.08, -1.5)		2341.7 (1690.8, 3246.4)	2544.9 (1836.1, 3551.3)	8.68 (3.25, 14.63)
DALYs	38274.5 (16930.4, 77128.8)	35520.5 (16037.3, 72064.2)	-7.2 (-12.48, -2.08)		20.4 (9, 41.1)	22.2 (10.1, 45.2)	8.61 (3.18, 14.44)
Brunei Darussalam
Incidence	143.9 (99.8, 206.8)	298.4 (205.9, 421.6)	107.46 (88.29, 135.68)		49 (34, 70.5)	74.8 (52.1, 104.8)	52.68 (39.11, 71.69)
Prevalence	3293.3 (2289.6, 4790.6)	9654.4 (6789, 13508.2)	193.15 (168.07, 231.21)		1112.6 (777.4, 1617.3)	1750.4 (1236.3, 2447.3)	57.34 (44.51, 76.58)
DALYs	29 (12.8, 60.3)	84.1 (38.1, 172.4)	189.89 (162.63, 227.79)		9.7 (4.3, 20.2)	15.3 (6.9, 31.3)	56.6 (42.52, 76.57)
Japan
Incidence	136181.6 (95579.8, 193637.1)	87448 (61827.7, 123721.4)	-35.79 (-39.1, -31.09)		119.7 (85.7, 166.7)	129.5 (92.2, 182.4)	8.2 (0.71, 15.64)
Prevalence	3845218.1 (2749649, 5341889.8)	3234636.1 (2310710.4, 4540640.2)	-15.88 (-21.26, -10.7)		2932.1 (2105, 4080.1)	3104.7 (2244.2, 4312.7)	5.89 (-0.35, 12.13)
DALYs	33374.2 (14748.6, 67110)	27969.8 (12709, 56664.5)	-16.19 (-21.3, -11.12)		25.6 (11.3, 51.4)	27 (12.3, 54.9)	5.7 (-0.3, 12.03)
Singapore
Incidence	1357.8 (933.5, 1932.1)	2033.2 (1407.7, 2951.4)	49.74 (31.78, 70.79)		44.1 (30.9, 63.1)	73.8 (51.4, 107.5)	67.31 (49.22, 89.91)
Prevalence	43470.7 (30583.6, 62227.8)	111651 (78448.4, 161172.9)	156.84 (131.84, 193.51)		1131.5 (797.4, 1617.6)	1815.8 (1277.4, 2599.7)	60.48 (44.5, 81.96)
DALYs	381.8 (171.8, 780.1)	966.4 (454.6, 2037)	153.14 (128.74, 188.48)		9.9 (4.5, 20.2)	15.9 (7.3, 33.7)	60.02 (43.8, 79.88)
Republic of Korea
Incidence	21247.9 (14577.1, 29794.4)	17390.9 (12118.4, 24770.9)	-18.15 (-27.79, -8.79)		40.7 (28.6, 57.4)	63.2 (44.5, 89.7)	55.5 (37.39, 74.82)
Prevalence	510373.3 (358575.9, 733120.7)	749041.2 (521395.3, 1062722.4)	46.76 (31.46, 64.45)		982.4 (690.4, 1408.1)	1487 (1043.7, 2122.6)	51.36 (35.25, 69.88)
DALYs	4489.5 (1991.6, 9178.1)	6500.2 (2979.3, 13074)	44.79 (29.17, 64.05)		8.6 (3.8, 17.6)	13 (6, 26.3)	50.84 (34.78, 71.22)
Western Europe
Incidence	206740.9 (146330.9, 286172.1)	206192.2 (145653.5, 286689.1)	-0.27 (-3.7, 2.77)		69.9 (49.2, 97.8)	75.2 (53.1, 105)	7.56 (3.65, 10.89)
Prevalence	6815142.5 (4796290.8, 9455180.2)	7455929.3 (5232259.4, 10460556.8)	9.4 (5.38, 13.39)		1751.6 (1233.8, 2431.9)	1944.3 (1361.7, 2726.7)	11 (7.06, 14.84)
DALYs	60788.9 (27584.9, 126652.6)	66041.5 (29857.2, 136985.1)	8.64 (4.31, 12.51)		15.6 (7.1, 32.5)	17.3 (7.8, 35.9)	10.93 (6.72, 14.96)
Andorra
Incidence	23.8 (16.4, 34.3)	33.4 (23.1, 47.1)	40.28 (22.17, 64.16)		54.5 (37.3, 78.1)	68.1 (46.8, 96.7)	25.05 (8.45, 45.65)
Prevalence	868.2 (596.4, 1237.1)	1444.3 (1002.8, 2030.6)	66.34 (48.43, 93.55)		1336.3 (922.5, 1902.5)	1731.5 (1194.2, 2445.6)	29.58 (14.3, 50.73)
DALYs	7.8 (3.5, 16.3)	12.8 (5.7, 26.7)	63.31 (44.19, 91.81)		12 (5.4, 24.9)	15.5 (6.9, 32.6)	28.91 (13.03, 51.14)
Austria
Incidence	3839.1 (2757.4, 5239.5)	3758.2 (2632.3, 5235.3)	-2.11 (-13.64, 13.7)		70.2 (50.1, 96.7)	73.6 (50.8, 103.2)	4.83 (-8.33, 21.97)
Prevalence	148357.8 (104606.1, 204799.1)	157940 (109288.8, 222554.3)	6.46 (-5.88, 22.65)		1834.4 (1284.9, 2532.8)	1923.7 (1328.6, 2716.8)	4.87 (-7.57, 21.4)
DALYs	1317.8 (595.1, 2686.5)	1390.5 (608.8, 2855.1)	5.52 (-7.1, 21.74)		16.3 (7.3, 33.3)	17 (7.4, 34.9)	4.65 (-8.29, 20.86)
Belgium
Incidence	4164.7 (2839.7, 5925.8)	5059.8 (3571.5, 7107.1)	21.49 (6.53, 37.49)		56.9 (38.9, 81.7)	66.9 (47.2, 94.2)	17.73 (2.99, 34.5)
Prevalence	147102.7 (101137.7, 210289.2)	178151.1 (124278.2, 248709)	21.11 (5.24, 38.45)		1468.6 (1009.4, 2100.1)	1757 (1221.7, 2452)	19.64 (3.54, 37.04)
DALYs	1323.7 (583.3, 2742.1)	1577.2 (720.6, 3300.2)	19.15 (3.44, 37.68)		13.2 (5.8, 27.4)	15.7 (7.2, 32.8)	18.36 (2.91, 36.68)
Cyprus
Incidence	315 (218.2, 442.1)	500.5 (347.1, 716)	58.89 (38.84, 83.77)		43 (29.7, 60.4)	62.6 (43.3, 89.9)	45.67 (26.92, 68.39)
Prevalence	9141.2 (6355, 12886.4)	23926.1 (16536.2, 34357.6)	161.74 (127.8, 201.22)		1121.5 (780, 1581.5)	1661.3 (1150.1, 2393.8)	48.14 (29.32, 70.57)
DALYs	82.5 (36.7, 168.6)	213.4 (94.8, 437.5)	158.68 (128.13, 199.53)		10.1 (4.5, 20.7)	14.9 (6.7, 30.5)	47.41 (30.03, 71.3)
Denmark
Incidence	2032.8 (1409.7, 2893.4)	2516.9 (1744.5, 3582)	23.82 (11.21, 42.27)		51.3 (34.9, 73.6)	64.4 (44.3, 91.6)	25.54 (12.2, 45.02)
Prevalence	66611.4 (46410.9, 92809.4)	83546.8 (58300, 115406.1)	25.42 (12.04, 43.15)		1243.4 (865.2, 1740.5)	1605.7 (1115.6, 2219.5)	29.14 (15.34, 47.35)
DALYs	602.5 (276.3, 1224.3)	753.4 (344.2, 1540.9)	25.04 (11.08, 40.58)		11.3 (5.2, 22.7)	14.5 (6.6, 29.6)	28.95 (14.15, 44.75)
Finland
Incidence	1879.7 (1274.7, 2703.2)	2285.3 (1567.7, 3255.8)	21.58 (6.28, 38.53)		51.4 (34.8, 74.1)	64.3 (44.1, 91.9)	25.07 (9.2, 43.12)
Prevalence	67115.9 (46388.9, 94873.4)	76672 (52775.6, 107497.6)	14.24 (0.18, 30.3)		1285.8 (888.8, 1814.4)	1618.2 (1118.2, 2274.1)	25.85 (10.33, 43.63)
DALYs	601.7 (267.4, 1249.6)	684.9 (310.2, 1407.4)	13.83 (-0.44, 29.59)		11.6 (5.1, 24)	14.5 (6.6, 29.8)	25.73 (10.39, 43.06)
France
Incidence	22610.8 (15712.5, 32098)	28748.8 (19848, 40731.7)	27.15 (11.44, 42.74)		47.7 (32.9, 68.4)	60.1 (41.3, 85.2)	25.94 (10.9, 41.67)
Prevalence	733610.8 (499907.7, 1045999.7)	911482.7 (624227, 1291203.1)	24.25 (9.78, 39.56)		1251.4 (852.8, 1781.4)	1591 (1088.1, 2261.7)	27.14 (12.18, 42.79)
DALYs	6714.1 (2999, 13978.7)	8230.3 (3734.8, 17025.9)	22.58 (8.49, 37.88)		11.5 (5.1, 23.9)	14.5 (6.5, 29.9)	26.16 (11.67, 41.71)
Germany
Incidence	24007 (16957.8, 33251.8)	27013.9 (19008.2, 37906.2)	12.53 (0.14, 26.15)		48.4 (33.8, 67.4)	59.4 (41.3, 83.4)	22.72 (8.79, 37.83)
Prevalence	973039.8 (693158.3, 1332134.5)	1072458.8 (750548, 1495114.7)	10.22 (-1.06, 22.97)		1202.5 (850.3, 1651.1)	1474.8 (1028.6, 2049.3)	22.65 (10.02, 36.81)
DALYs	8801.3 (4084, 18346.1)	9512.4 (4369.3, 19280.7)	8.08 (-5.34, 21.73)		10.9 (5, 22.7)	13.1 (6, 26.6)	20.83 (5.98, 36.52)
Greece
Incidence	4916.4 (3361.3, 6940.1)	4181.6 (2825.1, 5959.1)	-14.95 (-26.87, -2.95)		55 (37.8, 78)	69.9 (47.1, 99.7)	27.1 (8.66, 44.75)
Prevalence	146974.7 (100920.4, 209824.1)	158477.8 (109353.5, 226715.4)	7.83 (-5.38, 22.1)		1440 (986.9, 2051.5)	1805.7 (1242.9, 2566.7)	25.39 (10.06, 42.66)
DALYs	1316.3 (585.4, 2705.7)	1400.4 (631.5, 2948.8)	6.39 (-6.67, 20.39)		12.9 (5.7, 26.5)	16.1 (7.3, 34)	24.86 (9.25, 41.04)
Iceland
Incidence	137.5 (95.9, 195.1)	187.7 (129, 262.6)	36.46 (23.42, 56.13)		57.1 (39.4, 81.7)	71.6 (49.2, 100.2)	25.35 (13.44, 42.94)
Prevalence	3891.6 (2700.8, 5475)	6018.4 (4220.8, 8549.6)	54.65 (40.17, 74.18)		1460.7 (1012.8, 2054.6)	1805.4 (1261, 2569.6)	23.6 (12.05, 39.33)
DALYs	35 (16, 72.8)	53.8 (24.3, 111.1)	53.41 (36.86, 73.58)		13.1 (6, 27.2)	16.2 (7.3, 33.3)	23.18 (10.32, 39.73)
Ireland
Incidence	2142 (1445.2, 3032.2)	2635.3 (1847, 3786.6)	23.03 (8.3, 45.23)		53.2 (36, 75.1)	66.5 (46.6, 95.4)	25.1 (10.05, 46.84)
Prevalence	49444.3 (33997, 70894.8)	81450.7 (57035.9, 115151.4)	64.73 (46.1, 90.75)		1380.2 (951.1, 1976.5)	1741.5 (1214.9, 2456.2)	26.17 (11.98, 46)
DALYs	443.7 (194.7, 918.5)	722.2 (324.1, 1478)	62.75 (42.35, 89.68)		12.4 (5.4, 25.6)	15.6 (7, 31.7)	25.57 (9.91, 46.3)
Israel
Incidence	2622.7 (1812.4, 3761.4)	5511.1 (3786.1, 7772.3)	110.13 (85.92, 135.64)		46.8 (32.4, 66.9)	60.9 (41.9, 85.9)	30.18 (15.09, 45.48)
Prevalence	59936.8 (41745.4, 86354.3)	141616.7 (98543, 200911.3)	136.28 (108.57, 164.74)		1226.2 (854.4, 1762.2)	1561.5 (1085.8, 2213.9)	27.35 (12.7, 42.76)
DALYs	537.3 (239.8, 1112.2)	1259.6 (562.5, 2601.2)	134.41 (107.47, 163.04)		11 (4.9, 22.8)	13.9 (6.2, 28.7)	26.64 (12.47, 41.83)
Italy
Incidence	76866.9 (54583.5, 107566.6)	51696 (36308, 72441.1)	-32.75 (-37.86, -28.84)		176.6 (122.5, 251.2)	158 (110.1, 222.2)	-10.53 (-17.1, -5.29)
Prevalence	2445617 (1752163.9, 3371440)	1974972.6 (1396990.2, 2743152.6)	-19.24 (-25.01, -14.52)		4256.2 (3047.7, 5862.2)	3978.9 (2823.1, 5523.3)	-6.52 (-13.08, -1.05)
DALYs	21401.7 (9657, 45339.7)	17308.7 (7773.8, 36906.1)	-19.12 (-25.29, -13.95)		37.3 (16.8, 79)	35.1 (15.8, 74.9)	-5.69 (-12.63, 0.36)
Luxembourg
Incidence	135.2 (92, 192.6)	270.8 (186.4, 383.1)	100.28 (74.95, 123.81)		54.1 (36.5, 77.3)	68.8 (47.3, 97.9)	27.27 (11.08, 42.43)
Prevalence	5546.6 (3777.5, 7868.7)	11390 (8021, 16079.3)	105.35 (81.13, 130.36)		1381.4 (944.3, 1956.1)	1772.1 (1240, 2491.9)	28.28 (12.92, 44.08)
DALYs	49.8 (22.3, 102.5)	101.4 (44.8, 210.3)	103.5 (79.4, 128.79)		12.4 (5.5, 25.5)	15.9 (7.1, 33)	27.8 (12.55, 44.06)
Malta
Incidence	167.4 (117.2, 237)	160.7 (110.1, 228.1)	-3.99 (-17.6, 7.4)		50.1 (35, 70.9)	68.3 (46.4, 97.5)	36.49 (17.22, 53.36)
Prevalence	5076.1 (3513.3, 7254.4)	6848.9 (4772.9, 9748.9)	34.92 (16.72, 50.89)		1312.2 (906.6, 1871.3)	1744.4 (1215.5, 2472.4)	32.93 (15.14, 49.44)
DALYs	45.4 (20.2, 91.4)	60.9 (27.5, 124)	33.91 (14.8, 49.67)		11.8 (5.3, 23.6)	15.6 (7, 31.8)	32.15 (13.53, 48.47)
Monaco
Incidence	8.4 (5.8, 11.9)	13.9 (9.5, 19.7)	66.45 (44.66, 85.77)		58.1 (40.3, 82.3)	70.2 (48.1, 100.2)	20.72 (5.21, 35.23)
Prevalence	433.4 (297.9, 619.3)	529.3 (366.3, 747.1)	22.14 (7.12, 35.09)		1553.8 (1057.6, 2227.4)	1837.7 (1268.2, 2595.8)	18.27 (3.61, 31.38)
DALYs	3.9 (1.7, 8.1)	4.7 (2.1, 9.9)	21.18 (5.76, 34.96)		14 (6.2, 29.3)	16.4 (7.4, 34.5)	17.59 (2.8, 31.02)
Netherlands
Incidence	5488.2 (3796.7, 7793.4)	6746.5 (4690.7, 9664.3)	22.93 (7.18, 40.51)		47.6 (32.4, 67.4)	60.3 (41.7, 86.7)	26.54 (9.65, 45.45)
Prevalence	197962.7 (135560.7, 280169.6)	234128.2 (162311.6, 332033.6)	18.27 (2.82, 36.57)		1218.2 (831.7, 1716.5)	1557.3 (1075.1, 2203)	27.83 (10.82, 47.86)
DALYs	1785.9 (796.7, 3664.8)	2092 (917.2, 4388.8)	17.14 (1.71, 34.68)		11 (4.9, 22.5)	14 (6.1, 29.1)	27.08 (10.28, 45.54)
Norway
Incidence	1773.7 (1251.5, 2487.4)	2287.2 (1616.5, 3227.9)	28.96 (22.35, 35.83)		53.3 (37.3, 74.9)	60.9 (43, 86.3)	14.23 (8.88, 19.61)
Prevalence	59301.7 (41433.4, 83554.3)	78878.5 (55520.9, 112443.9)	33.01 (25.77, 38.59)		1368.1 (953.8, 1930.4)	1560.3 (1095.6, 2226.5)	14.05 (7.88, 19.11)
DALYs	531.2 (238.7, 1099.5)	702.6 (312.9, 1448)	32.27 (25.44, 38.43)		12.3 (5.5, 25.4)	14 (6.3, 28.7)	13.84 (8.05, 19.18)
Portugal
Incidence	4516.6 (3141.5, 6426.8)	3817.5 (2607.4, 5390.1)	-15.48 (-24.73, -4.53)		46 (31.9, 65)	62.6 (42.7, 88.3)	36.12 (19.53, 54.98)
Prevalence	122619 (85006.3, 174013.3)	153295.7 (105685, 217610.9)	25.02 (10.67, 40.94)		1215.2 (842, 1724.8)	1650.7 (1136.7, 2337.8)	35.84 (20.22, 54.05)
DALYs	1099.6 (490, 2242.6)	1358.2 (627.3, 2727.6)	23.51 (8.46, 38.29)		10.9 (4.9, 22.2)	14.8 (6.8, 29.7)	35.41 (19.44, 52.24)
San Marino
Incidence	11.5 (7.9, 16.2)	13.7 (9.4, 19)	19.18 (4.01, 36.12)		57.4 (39.8, 81.6)	66.7 (45.7, 93.3)	16.09 (0.6, 33.04)
Prevalence	369.4 (256.9, 526.7)	506.9 (347.3, 710)	37.24 (19.72, 55.99)		1477 (1027.1, 2107.9)	1805.6 (1230.7, 2522.9)	22.25 (6.45, 39.25)
DALYs	3.3 (1.5, 6.9)	4.5 (2, 9.5)	34.85 (18.05, 53.34)		13.3 (6, 27.7)	16.1 (7.2, 33.8)	21.27 (6.32, 38.54)
Spain
Incidence	19269.5 (13322.1, 26931.2)	17911.1 (12395.8, 25474.1)	-7.05 (-19.35, 6.56)		51.4 (35.4, 71.7)	64.7 (44.5, 92.2)	25.72 (9.64, 43.62)
Prevalence	504654.3 (348792.5, 709608.3)	661982.7 (463317.3, 921945.3)	31.18 (15.18, 48.42)		1292.3 (892.2, 1817.9)	1636.5 (1145.9, 2282.1)	26.63 (10.59, 43.99)
DALYs	4521.4 (2076.3, 9504.2)	5803.4 (2606, 12243.4)	28.35 (12.24, 46.66)		11.6 (5.3, 24.3)	14.5 (6.6, 30.4)	25.26 (9.34, 44.08)
Sweden
Incidence	2480 (1769.1, 3488.9)	3463.7 (2438, 4906.5)	39.67 (26.72, 55.86)		40.4 (28.4, 57.8)	48.9 (34.2, 69.5)	20.91 (9.74, 34.4)
Prevalence	88700.1 (61989.6, 126782)	116224.6 (81057.2, 164271.7)	31.03 (19.77, 44.88)		1051.8 (732.9, 1507.4)	1263.7 (878.1, 1785.4)	20.14 (9.61, 32.61)
DALYs	793.9 (353.9, 1644.4)	1032.6 (465.9, 2121.4)	30.07 (18.8, 45.29)		9.5 (4.2, 19.6)	11.3 (5.1, 23.2)	19.46 (8.71, 33.47)
Switzerland
Incidence	2430.8 (1682.8, 3418.4)	3008.9 (2108.4, 4291.6)	23.78 (10.39, 41.36)		53.1 (36.3, 75.5)	59.6 (41.6, 85.7)	12.28 (-0.9, 27.65)
Prevalence	98196 (68243, 139932.6)	124099.2 (86043, 175921)	26.38 (13.03, 42.32)		1346.9 (931.9, 1922.2)	1524 (1063.9, 2149.8)	13.15 (0.89, 27.47)
DALYs	879.2 (384.9, 1803.2)	1102 (492, 2262)	25.34 (12.07, 42.46)		12.1 (5.3, 24.6)	13.6 (6.1, 27.8)	12.88 (0.62, 28.9)
United Kingdom
Incidence	24731.4 (17510.3, 34354)	34188.2 (24138.9, 47823.3)	38.24 (32.52, 42.45)		58.4 (41.2, 82.2)	73.7 (52, 103.3)	26.24 (23.25, 28.9)
Prevalence	874969.8 (610581.1, 1244531.6)	1193322.7 (836035.9, 1698024)	36.38 (32.67, 39.42)		1528.2 (1062.7, 2174.1)	1935.6 (1349, 2744.1)	26.65 (23.23, 29.48)
DALYs	7839.7 (3497.8, 16184.6)	10601.6 (4787, 21949)	35.23 (31.56, 38.4)		13.7 (6.1, 28.3)	17.3 (7.8, 35.6)	26.18 (22.82, 29.03)
Southern Latin America
Incidence	12429.8 (8602.2, 17727.2)	21574.4 (15329.6, 30970)	73.57 (59.28, 90.52)		23.3 (16.1, 33.3)	36.6 (25.9, 52.4)	57.18 (43.87, 72.8)
Prevalence	296321.5 (204840.7, 431020.1)	667604.8 (469021.5, 956761.4)	125.3 (107.55, 146.54)		600.5 (416.5, 874.7)	950.5 (666.4, 1360.4)	58.28 (46.09, 72.93)
DALYs	2627.8 (1179.4, 5421.3)	5893.5 (2574.8, 12247.5)	124.27 (104.79, 146.08)		5.3 (2.4, 11)	8.4 (3.7, 17.4)	58.03 (44.42, 74.12)
Argentina
Incidence	8150.9 (5650.4, 11661.5)	14464.8 (10257.2, 20683.3)	77.46 (58.31, 101.7)		23 (15.9, 32.8)	35 (24.8, 50.1)	52.38 (35.8, 70.47)
Prevalence	188624.2 (130543.6, 271701.3)	430891.7 (302555.8, 613693.2)	128.44 (105.67, 154.99)		588.1 (406.6, 848.5)	905.8 (635.8, 1288.5)	54.03 (38.51, 72.26)
DALYs	1670.4 (747, 3439.7)	3810 (1682.5, 7869.1)	128.09 (103.18, 157.16)		5.2 (2.3, 10.7)	8 (3.5, 16.5)	54.03 (37.48, 73.59)
Chile
Incidence	3561.7 (2499.9, 5098.5)	6057.2 (4275.8, 8709.6)	70.07 (50.57, 90.68)		24.2 (16.9, 34.9)	41 (28.8, 59)	69.64 (50.81, 91.48)
Prevalence	89597.2 (62223.2, 129860.8)	203583.4 (142311.7, 295879.5)	127.22 (103.79, 157.29)		628.2 (437.4, 909.8)	1052.8 (738.2, 1526.9)	67.61 (50.35, 90.79)
DALYs	797 (344.7, 1641.5)	1791.9 (763.8, 3675.7)	124.83 (99.33, 157.63)		5.6 (2.4, 11.4)	9.3 (4, 19)	66.95 (48.6, 90.7)
Uruguay
Incidence	716.6 (504.9, 1016.6)	1051.2 (738.1, 1515.1)	46.7 (32.32, 64.73)		23.2 (16.4, 32.9)	38 (26.8, 54.9)	63.74 (47.99, 84.26)
Prevalence	18086 (12558.2, 25939.7)	33092.9 (23318.2, 48297.8)	82.98 (64.12, 104.59)		602.7 (418.4, 865)	997.6 (703.1, 1450.5)	65.53 (48.5, 84.27)
DALYs	160.3 (69.6, 330.1)	291.3 (126.7, 581.7)	81.76 (62.81, 103.97)		5.3 (2.3, 11)	8.8 (3.8, 17.6)	64.84 (47.81, 85.38)
Eastern Europe
Incidence	8328.3 (5913.3, 11639.2)	7596.1 (5457.5, 10592.6)	-8.79 (-13.5, -4.38)		4.2 (3, 5.9)	5.3 (3.7, 7.5)	25.78 (19.64, 31.1)
Prevalence	237422.1 (160523.3, 339244.5)	265678.7 (185374.4, 381763)	11.9 (6.13, 16.8)		103.8 (70, 149.6)	132.4 (91.2, 190.5)	27.48 (21, 33.15)
DALYs	2097.7 (868.6, 4466.8)	2323.7 (970, 4890.4)	10.77 (4.82, 17.26)		0.9 (0.4, 2)	1.2 (0.5, 2.5)	27.16 (20.16, 34.26)
Belarus
Incidence	359.5 (249.6, 512.3)	310.3 (218.4, 439.8)	-13.68 (-23.41, -2.65)		4 (2.7, 5.7)	5.2 (3.6, 7.5)	29.65 (15.3, 45.26)
Prevalence	10402.3 (7032.5, 15305.3)	11603.3 (7955.8, 16946.9)	11.55 (-1.22, 25.27)		100.5 (68.1, 148.7)	131.9 (89.5, 196.5)	31.27 (15.48, 46.68)
DALYs	92.1 (38.3, 198.3)	101.2 (42.1, 220.1)	9.81 (-8.12, 29.27)		0.9 (0.4, 1.9)	1.2 (0.5, 2.6)	30.42 (8.9, 54.85)
Estonia
Incidence	55.7 (39.3, 78.9)	49.2 (34.5, 71.5)	-11.58 (-21.32, 0.34)		4.2 (2.9, 6)	5.8 (4, 8.5)	39.02 (24.04, 58.11)
Prevalence	1666.7 (1124.5, 2404.6)	1719.6 (1156.6, 2548.8)	3.17 (-8.85, 18.68)		107.1 (72.1, 155.3)	146.5 (98.3, 220.2)	36.78 (20.89, 57.78)
DALYs	14.8 (6, 30.5)	15.1 (6.2, 33.4)	2.26 (-12.89, 22.25)		1 (0.4, 2)	1.3 (0.5, 2.9)	36.48 (16.07, 61.84)
Latvia
Incidence	90.7 (63.5, 130.2)	61.9 (43.8, 87.7)	-31.72 (-38.45, -23.94)		4.2 (2.9, 6.1)	5.4 (3.8, 7.7)	28.56 (15.61, 42.61)
Prevalence	2803.6 (1906.8, 4252.7)	2222.8 (1532.5, 3192.6)	-20.71 (-29.07, -12.56)		106.7 (72.1, 163)	136.8 (93.7, 199)	28.21 (14.63, 42.31)
DALYs	24.8 (10.4, 53.4)	19.3 (8, 41.4)	-22.16 (-33.23, -10.05)		0.9 (0.4, 2)	1.2 (0.5, 2.6)	26.71 (8.21, 47.88)
Lithuania
Incidence	125.1 (84.8, 179.1)	85.5 (61.6, 122.4)	-31.63 (-39.45, -22.56)		3.8 (2.6, 5.6)	5.2 (3.7, 7.6)	36.1 (20.95, 52.03)
Prevalence	3610.1 (2390.7, 5312.8)	3154.2 (2197.5, 4667.2)	-12.63 (-22.72, -1.36)		97.1 (64, 143.4)	132.2 (91.4, 198.5)	36.18 (20.01, 52.95)
DALYs	31.9 (13, 67)	27.4 (11.3, 58.2)	-14.1 (-26.06, 4.64)		0.9 (0.3, 1.8)	1.2 (0.5, 2.5)	34.75 (15.36, 65.46)
Republic of Moldova
Incidence	144.9 (98.7, 210.2)	110.6 (78.5, 153.8)	-23.64 (-34.11, -12.66)		3.4 (2.3, 4.9)	4.8 (3.3, 6.8)	41.52 (23.75, 62.43)
Prevalence	3877.1 (2567.2, 5753.2)	4465 (3085.7, 6491.2)	15.16 (1.11, 31.89)		86.5 (57.3, 128.6)	121.6 (82.5, 179.2)	40.65 (23.34, 61.8)
DALYs	34.4 (14.4, 73.6)	39.2 (16.3, 84.6)	14.02 (-5.97, 38.31)		0.8 (0.3, 1.6)	1.1 (0.4, 2.3)	40.66 (15.91, 69.73)
Russian Federation
Incidence	5696.9 (4011.4, 7947.3)	5581.9 (3998.2, 7753.7)	-2.02 (-7.14, 3.01)		4.3 (3, 6.1)	5.5 (3.9, 7.8)	26.96 (20.94, 33.18)
Prevalence	162856.9 (110177.8, 232379)	192213.7 (134056.7, 274334.9)	18.03 (12.07, 23.9)		105.7 (71.6, 151.6)	136.8 (94.6, 195.9)	29.42 (22.94, 36.12)
DALYs	1434.4 (593.2, 3089)	1676.8 (693, 3513.2)	16.91 (10.24, 23.33)		0.9 (0.4, 2)	1.2 (0.5, 2.5)	29.13 (22.14, 36.37)
Ukraine
Incidence	1855.7 (1327.8, 2609.7)	1396.6 (1019.6, 1945.9)	-24.74 (-32.29, -17.63)		4.1 (2.9, 5.9)	4.8 (3.4, 6.9)	16.51 (4.24, 27.63)
Prevalence	52205.5 (35193.3, 75500.6)	50300.1 (34527.3, 72962.9)	-3.65 (-13.48, 5.69)		100.8 (68, 146.6)	118.1 (80.3, 173.6)	17.19 (5.49, 28.04)
DALYs	465.3 (192.7, 934)	444.6 (188.2, 945.1)	-4.45 (-18.91, 11.74)		0.9 (0.4, 1.8)	1.1 (0.4, 2.3)	17.23 (0.49, 35.9)
Central Europe
Incidence	4244.9 (2905.8, 6223.9)	3175.5 (2221.1, 4441)	-25.19 (-32.84, -16.46)		3.6 (2.5, 5.3)	4.3 (3, 6.1)	20.88 (9.32, 33.99)
Prevalence	116152 (76721, 173921.5)	119149.2 (82050.4, 168514)	2.58 (-8.58, 14.75)		91.9 (60.8, 137.8)	111.7 (77, 159.2)	21.52 (8.7, 35.59)
DALYs	1014.7 (425.9, 2088.9)	1032.7 (442.9, 2156.6)	1.77 (-9.68, 15.06)		0.8 (0.3, 1.7)	1 (0.4, 2)	21.11 (8.12, 36.15)
Albania
Incidence	109.5 (73, 164)	71.9 (49.6, 104.1)	-34.34 (-40.36, -24.75)		2.8 (1.9, 4.3)	3.7 (2.5, 5.4)	28.37 (16.31, 46.85)
Prevalence	2446.6 (1589.4, 3746.6)	2384 (1587.4, 3625.1)	-2.56 (-12.64, 11.7)		70.6 (46.5, 107.8)	93.1 (61.5, 141.7)	31.96 (19.14, 51.24)
DALYs	21.6 (8.8, 46.7)	21.1 (8.9, 45.8)	-2.47 (-19.2, 18.19)		0.6 (0.3, 1.3)	0.8 (0.3, 1.8)	32.72 (9.52, 59.11)
Bosnia and Herzegovina
Incidence	107.6 (71.6, 164.1)	77.7 (52.8, 112.6)	-27.75 (-37.22, -16.86)		2.4 (1.6, 3.7)	3.7 (2.5, 5.4)	53.96 (33.68, 78.21)
Prevalence	2923.9 (1873, 4598)	2841.9 (1866, 4326)	-2.81 (-16.05, 12.97)		60.2 (38.6, 94.8)	94 (61.5, 144.2)	56.15 (36.15, 81.57)
DALYs	25.6 (10.6, 53.7)	24.6 (10.4, 53)	-3.7 (-19.99, 16.84)		0.5 (0.2, 1.1)	0.8 (0.3, 1.8)	55.57 (29.54, 89.78)
Bulgaria
Incidence	243.8 (163.4, 358.5)	167.9 (116.1, 244.9)	-31.13 (-38.5, -21.95)		3.3 (2.2, 4.9)	4.2 (2.8, 6.2)	27 (12.52, 43.81)
Prevalence	7178.9 (4600.8, 10859.6)	6314.9 (4208.5, 9406.5)	-12.03 (-22.27, -0.54)		85.1 (54.3, 129.3)	106.1 (70.1, 158.4)	24.65 (10.58, 41.3)
DALYs	62.4 (25.7, 133.9)	54.4 (22.6, 113.4)	-12.84 (-26.16, 5.5)		0.7 (0.3, 1.6)	0.9 (0.4, 1.9)	24.23 (6.2, 50.25)
Croatia
Incidence	124.7 (84.2, 185.6)	104.7 (72.2, 149.8)	-16 (-25.88, -0.02)		3 (2, 4.6)	4.1 (2.7, 5.9)	33.49 (18.07, 59.82)
Prevalence	3842.7 (2509.4, 5830.6)	3861.7 (2550, 5790)	0.5 (-10.71, 17.69)		77.3 (50.1, 118.2)	103.8 (68.5, 156.2)	34.31 (18.67, 57.99)
DALYs	33.3 (14.1, 71.6)	33.5 (13.5, 71.4)	0.62 (-17.53, 23.85)		0.7 (0.3, 1.4)	0.9 (0.4, 1.9)	34.85 (9.45, 65.84)
Czechia
Incidence	307.1 (197.7, 453.9)	261.6 (179.3, 382.9)	-14.81 (-24.41, -2.7)		3.1 (2, 4.6)	4 (2.7, 5.9)	27.16 (12.86, 44.4)
Prevalence	8395.9 (5370.8, 12476)	9601.2 (6367.5, 14247)	14.36 (0.8, 31)		80 (51.1, 119.1)	101.1 (66.7, 151.8)	26.25 (11.63, 45.57)
DALYs	72.6 (29.8, 156.2)	82.7 (34.8, 176.7)	13.88 (-5.07, 38.07)		0.7 (0.3, 1.5)	0.9 (0.4, 1.8)	26.2 (5.01, 53.45)
Hungary
Incidence	318 (208.6, 459.3)	239.6 (165.5, 348.5)	-24.65 (-33.33, -14.16)		3.4 (2.2, 4.9)	4.1 (2.8, 6.2)	22.65 (9.11, 38.36)
Prevalence	8968 (5719.8, 13395.8)	9278.1 (6131.8, 14078.2)	3.46 (-7.53, 16.24)		86.9 (55.1, 130.1)	105.8 (69.3, 162)	21.74 (8.9, 37.44)
DALYs	77.7 (33.3, 168.3)	80.2 (33.5, 170.7)	3.21 (-13.03, 22.91)		0.8 (0.3, 1.6)	0.9 (0.4, 1.9)	21.73 (3.03, 45.67)
Montenegro
Incidence	20.3 (13.5, 30)	18.7 (12.8, 27.3)	-7.54 (-17.3, 4.01)		3.3 (2.2, 4.8)	4.1 (2.8, 6)	26.13 (12.35, 42.44)
Prevalence	535.8 (348.4, 812.2)	629.4 (414.1, 930)	17.48 (4.98, 31.62)		82.7 (53.8, 125.5)	106.2 (69.5, 158.5)	28.4 (14.66, 44.29)
DALYs	4.7 (2, 9.9)	5.5 (2.2, 11.6)	17.39 (-0.34, 38.69)		0.7 (0.3, 1.5)	0.9 (0.4, 2)	28.79 (9.48, 53.02)
North Macedonia
Incidence	55.6 (37.6, 83.5)	53.8 (36.5, 77.6)	-3.32 (-16.77, 17.95)		2.8 (1.9, 4.1)	3.8 (2.5, 5.6)	36.4 (17.98, 66.3)
Prevalence	1458.5 (952.5, 2253.2)	2109 (1387.7, 3170)	44.61 (24.98, 75.59)		69.8 (45.6, 108)	94.6 (61.6, 144.2)	35.37 (17.67, 64.37)
DALYs	12.8 (5.1, 28.3)	18.2 (7.8, 38.6)	42.77 (18.06, 77.59)		0.6 (0.2, 1.4)	0.8 (0.4, 1.7)	34.52 (10.88, 69.13)
Poland
Incidence	1774.8 (1218.2, 2593.9)	1206.1 (881.8, 1614.7)	-32.04 (-43.67, -18.47)		5 (3.4, 7.3)	5.1 (3.7, 6.9)	3.13 (-13.84, 22.84)
Prevalence	49148.6 (32477.7, 73299.1)	47767.2 (33886.1, 64540.9)	-2.81 (-19.68, 16.77)		127.2 (83.7, 190.6)	132.5 (93.8, 181.1)	4.18 (-14.25, 25.45)
DALYs	431.7 (178.9, 878.9)	414.8 (184.3, 852.3)	-3.92 (-21.7, 16.04)		1.1 (0.5, 2.3)	1.2 (0.5, 2.3)	3.53 (-14.83, 25.28)
Romania
Incidence	657 (431.4, 977.7)	500.8 (340.1, 738.1)	-23.78 (-33.8, -10.62)		2.9 (1.9, 4.2)	4 (2.7, 5.9)	39.78 (22.67, 64.01)
Prevalence	16764.5 (10859.3, 25245.2)	17218.9 (11343.6, 26103.5)	2.71 (-9.89, 18.02)		72.6 (46.8, 109.4)	101.3 (66.4, 155.1)	39.61 (22.73, 62.08)
DALYs	146.3 (59.1, 303.4)	148.9 (61.7, 309.9)	1.84 (-16.02, 26.03)		0.6 (0.3, 1.3)	0.9 (0.4, 1.8)	39.28 (14.88, 73.5)
Serbia
Incidence	250 (164.3, 370.7)	237.9 (162.2, 338.8)	-4.85 (-16.95, 10.78)		2.9 (1.9, 4.3)	3.7 (2.5, 5.3)	28.94 (12.81, 51.72)
Prevalence	6961.5 (4507.3, 10462)	8136.8 (5374.2, 11804.1)	16.88 (2.17, 34.78)		71.8 (46.3, 108.5)	94.8 (62.4, 138.4)	32.03 (15.46, 52.81)
DALYs	60.8 (24.7, 126.3)	70.9 (29.2, 151.1)	16.54 (-3.47, 42.94)		0.6 (0.3, 1.3)	0.8 (0.3, 1.8)	31.98 (9.63, 61.95)
Slovakia
Incidence	154 (102.2, 228.7)	136.6 (96, 198.3)	-11.25 (-22.56, 5.7)		2.9 (2, 4.4)	4 (2.8, 5.9)	36.98 (21.54, 62.27)
Prevalence	4054 (2583.4, 6083.2)	5355 (3557.9, 8021)	32.09 (16.41, 55.65)		75 (47.8, 112.8)	102.5 (67.8, 153.7)	36.61 (20.73, 60.09)
DALYs	35.2 (14, 77.4)	46.4 (18.3, 105.2)	32.06 (10.37, 65.64)		0.7 (0.3, 1.4)	0.9 (0.4, 2)	37.21 (13.64, 73.53)
Slovenia
Incidence	54.7 (37.3, 79.9)	51.8 (34.8, 75)	-5.17 (-16.11, 8.91)		3.1 (2.1, 4.6)	4.3 (2.9, 6.3)	37.32 (21.38, 56.33)
Prevalence	1615.8 (1053.4, 2451.5)	1916.8 (1243.4, 2850.7)	18.63 (4.52, 35.2)		78.5 (51.2, 119.5)	107.6 (69.9, 159.4)	37.14 (21.46, 56.77)
DALYs	13.9 (5.8, 29.4)	16.4 (6.9, 34.6)	17.54 (-1.3, 42.13)		0.7 (0.3, 1.4)	0.9 (0.4, 2)	36.44 (14.69, 64.12)
Central Asia
Incidence	5347.8 (3686.1, 7702.4)	8122.3 (5654.1, 11355.5)	51.88 (40.1, 63.3)		6.8 (4.7, 9.7)	9.1 (6.3, 12.7)	34.83 (24.32, 44.09)
Prevalence	118817.9 (79820.2, 174950)	237958.9 (163368.4, 333464.7)	100.27 (84.89, 113.88)		175.7 (118.4, 257.8)	240.5 (164.6, 337.3)	36.84 (26.9, 46.84)
DALYs	1049.1 (438.1, 2236.9)	2079.4 (886.9, 4469.5)	98.2 (82.36, 113.87)		1.5 (0.6, 3.3)	2.1 (0.9, 4.5)	36.39 (26.18, 47.74)
Armenia
Incidence	215.8 (149.9, 307.6)	199.5 (137, 283.6)	-7.54 (-18.08, 5)		6.2 (4.3, 8.9)	9 (6.2, 13.1)	45.01 (28.52, 64.14)
Prevalence	5695.4 (3858.8, 8388.8)	7142.8 (4826, 10368.3)	25.41 (10.16, 42.73)		163.3 (110.7, 240.5)	240.4 (162.5, 350.9)	47.19 (29.5, 66.98)
DALYs	49.5 (20.3, 106.7)	61.6 (26.6, 130.9)	24.43 (5.6, 47.32)		1.4 (0.6, 3.1)	2.1 (0.9, 4.4)	46.7 (24.73, 73.68)
Azerbaijan
Incidence	517.9 (361.5, 731.1)	818.4 (559.9, 1129.5)	58.04 (43.02, 77.66)		6.3 (4.4, 9)	9.2 (6.2, 12.8)	46.3 (32.07, 63.39)
Prevalence	12508 (8481.3, 18705.6)	28152.1 (18861.2, 40757.9)	125.07 (105.21, 152.36)		167.6 (113.5, 248.6)	248 (165.7, 357)	47.93 (34.06, 65.7)
DALYs	111.4 (45.7, 242.4)	246.9 (101.1, 537.9)	121.52 (93.33, 158.16)		1.5 (0.6, 3.2)	2.2 (0.9, 4.8)	47.2 (28.55, 69.94)
Georgia
Incidence	401.4 (275, 568.5)	332.6 (231.5, 458.7)	-17.14 (-29.04, -2.8)		7.9 (5.4, 11.3)	13.3 (9.1, 18.3)	67.98 (44.53, 96.5)
Prevalence	11504.4 (7601, 16751.1)	11496.3 (7893.4, 15984.4)	-0.07 (-16.44, 17.77)		210 (139, 306.6)	353.5 (241.4, 495.4)	68.31 (41.38, 98.32)
DALYs	101 (40.5, 215.2)	100 (43.4, 208)	-0.97 (-18.24, 18.83)		1.8 (0.7, 3.9)	3.1 (1.3, 6.4)	67.8 (38.48, 100.11)
Kazakhstan
Incidence	1258.3 (858.5, 1821.2)	1716.5 (1172.8, 2430)	36.41 (17.88, 55.12)		7.1 (4.9, 10.3)	10 (6.9, 14.1)	39.67 (20.8, 58.68)
Prevalence	30971.9 (20994.9, 45582.9)	49882.9 (33773.2, 70716.8)	61.06 (39.69, 84.45)		185 (125.5, 272.1)	262.4 (176.9, 372.6)	41.85 (23.17, 61.86)
DALYs	274.8 (117.2, 590)	435.5 (187.6, 922.1)	58.47 (35.97, 85.92)		1.6 (0.7, 3.5)	2.3 (1, 4.9)	40.5 (20.4, 64.7)
Kyrgyzstan
Incidence	344.6 (237.7, 491.2)	560.7 (373.4, 802.1)	62.69 (46.41, 82.15)		6.6 (4.6, 9.3)	7.8 (5.3, 11.2)	18.52 (7.52, 31.54)
Prevalence	7225.8 (4861.1, 10515.4)	14244.1 (9519.6, 20750.5)	97.13 (78.22, 119.65)		169.8 (115.4, 245.2)	204.2 (136.5, 297.3)	20.21 (8.73, 34.09)
DALYs	63.3 (26.3, 136.6)	124.4 (51.8, 269.8)	96.64 (68.25, 127.82)		1.5 (0.6, 3.2)	1.8 (0.7, 3.9)	20.46 (3.86, 39.27)
Mongolia
Incidence	179.3 (122.2, 255.1)	276.1 (188.8, 396)	53.97 (35.06, 74.24)		6.3 (4.4, 8.9)	8.9 (6.1, 12.7)	39.86 (23.47, 57.48)
Prevalence	3329.7 (2193.4, 4774.8)	7888.1 (5312.9, 11227.4)	136.9 (104.56, 168.3)		160.7 (107.4, 229.4)	230.2 (155.2, 328.3)	43.2 (25.34, 60.92)
DALYs	29.4 (12.5, 62.3)	68.9 (28.6, 150.5)	134.38 (96.99, 175.51)		1.4 (0.6, 2.9)	2 (0.8, 4.4)	43.54 (21.11, 68.39)
Tajikistan
Incidence	354.4 (245.6, 517)	743.8 (504.2, 1075.8)	109.89 (90.22, 135.68)		5.4 (3.7, 7.8)	6.8 (4.6, 9.7)	25.42 (13.75, 41.05)
Prevalence	6574.5 (4455.3, 9887.3)	17975.9 (11937.7, 26237)	173.42 (146.03, 206.95)		134.5 (92.1, 197.9)	172.2 (114.4, 250.8)	28.03 (14.63, 44.26)
DALYs	58.6 (24.3, 130.6)	160.5 (65.3, 346.5)	173.99 (137.17, 222.85)		1.2 (0.5, 2.7)	1.5 (0.6, 3.3)	29.3 (11.64, 50.9)
Turkmenistan
Incidence	306.6 (209.6, 441.8)	493 (339, 706.8)	60.79 (43.96, 83.59)		6.7 (4.6, 9.6)	9.4 (6.4, 13.5)	40.08 (25.52, 58.61)
Prevalence	6138 (4173.6, 8970.5)	12694.6 (8533.9, 18669.7)	106.82 (84.33, 135.26)		172.6 (117.9, 251.6)	234.9 (157.9, 345.4)	36.13 (21.35, 54.12)
DALYs	54.2 (22.3, 115.9)	110.8 (46.8, 235.3)	104.41 (76.12, 137.86)		1.5 (0.6, 3.2)	2 (0.9, 4.3)	35.58 (17.47, 56.58)
Uzbekistan
Incidence	1769.5 (1200.5, 2550.4)	2981.7 (2069.4, 4124.5)	68.5 (45.13, 91.24)		6.9 (4.7, 9.9)	9.4 (6.5, 13)	35.37 (16.64, 53.32)
Prevalence	34870.1 (23232, 51146.1)	88482.2 (59929.4, 124366.4)	153.75 (117.53, 190.16)		175.8 (117.5, 257.3)	245.1 (166.4, 344.9)	39.42 (19.38, 59.16)
DALYs	306.9 (126.2, 663.8)	770.8 (329.7, 1677.8)	151.16 (114.59, 193.44)		1.5 (0.6, 3.3)	2.1 (0.9, 4.7)	39.26 (18.37, 61.33)
Central Latin America
Incidence	119114.9 (81948.2, 168844.6)	143013.7 (100629.4, 200290.7)	20.06 (15.38, 25.42)		53.7 (37, 75.9)	57.2 (40, 80)	6.46 (2.69, 10.37)
Prevalence	2295522 (1578370.6, 3199568.8)	4072957.2 (2852240.6, 5662452.4)	77.43 (70.23, 84.75)		1382.5 (952.5, 1915.8)	1518.7 (1063, 2110.8)	9.85 (5.86, 14.43)
DALYs	20163.7 (9003.8, 42043)	35314.1 (15577.8, 73735.7)	75.14 (66.72, 83.06)		12.1 (5.4, 25.3)	13.2 (5.8, 27.5)	8.99 (4.69, 13.73)
Colombia
Incidence	13401.6 (9053.3, 19641.6)	18351.4 (12636.4, 26802.6)	36.93 (16.82, 60.25)		33.2 (22.4, 48.6)	42.3 (29.1, 62.2)	27.38 (8.65, 48.95)
Prevalence	293457.9 (197212.9, 421063.4)	578236.9 (394400, 838014.8)	97.04 (68.23, 128.34)		856.1 (573.6, 1234)	1098.7 (748.5, 1595.1)	28.33 (9.42, 48.98)
DALYs	2629.6 (1130.1, 5553.3)	5136.6 (2219.6, 10918.2)	95.34 (66.93, 126.75)		7.6 (3.3, 16.1)	9.8 (4.2, 20.7)	27.7 (9.03, 47.89)
Costa Rica
Incidence	1454.4 (984.1, 2159.4)	2155.4 (1461.8, 3075)	48.2 (25.58, 69.94)		39.5 (26.8, 58.6)	52.6 (35.5, 75.2)	33.25 (12.64, 52.56)
Prevalence	32808.9 (22257.1, 47561.8)	71476.9 (48426.3, 103396.5)	117.86 (84.08, 148.83)		1044.7 (713.3, 1512.1)	1414.2 (959.3, 2043.7)	35.36 (14.5, 54.5)
DALYs	287.7 (128.4, 598)	623.5 (269.2, 1351.4)	116.74 (80.77, 150.49)		9.1 (4.1, 18.9)	12.3 (5.3, 26.8)	35.43 (13.31, 54.87)
El Salvador
Incidence	2446.7 (1638.5, 3638.3)	3062.9 (2061.6, 4439.6)	25.18 (8.43, 46.01)		33 (22.3, 48.9)	46.2 (31, 67)	39.75 (21.05, 63.19)
Prevalence	45134.5 (30503.8, 66295.2)	86019.1 (58999.7, 123358.6)	90.58 (63.86, 123.66)		886.7 (599.7, 1296.9)	1290.3 (885.9, 1852.6)	45.52 (25.32, 70.74)
DALYs	399 (174.3, 846.3)	749.5 (327.7, 1573)	87.82 (61.25, 121.13)		7.8 (3.4, 16.4)	11.2 (4.9, 23.5)	43.78 (23.47, 68.58)
Guatemala
Incidence	3365.5 (2236.6, 4873.7)	7581 (5106.2, 10999.8)	125.26 (86.01, 170.06)		28.7 (19.4, 41.2)	40 (26.8, 57.9)	39.19 (16.52, 66.09)
Prevalence	54461.7 (36958.2, 79159.7)	183158.9 (120863.2, 267188.4)	236.31 (182.21, 299.48)		746.9 (506.5, 1083.4)	1081.6 (712.9, 1571.6)	44.81 (21.95, 71.22)
DALYs	471 (200.6, 1002.7)	1574 (679.5, 3249.7)	234.19 (183.15, 299.27)		6.4 (2.7, 13.7)	9.3 (4, 19.2)	44.07 (22.11, 69.64)
Honduras
Incidence	1778.1 (1191.1, 2611.3)	4965.1 (3366.7, 7119.8)	179.23 (138.97, 226)		26.7 (18.2, 38.9)	40.1 (27.2, 57.7)	50.22 (28.75, 74.81)
Prevalence	30017.2 (20363.2, 44109.1)	119557.6 (82136.9, 173794)	298.3 (241.4, 366.29)		712.7 (482.6, 1043.1)	1096.2 (751.2, 1593.2)	53.82 (32.14, 79.6)
DALYs	261.8 (114.2, 565.2)	1033.9 (452.5, 2194.7)	295.01 (238.53, 362.55)		6.2 (2.7, 13.3)	9.4 (4.2, 20.1)	52.82 (31.28, 78.76)
Mexico
Incidence	84708.7 (57983.8, 120030.4)	89661.7 (63147.6, 124689.2)	5.85 (-0.79, 11.03)		71.3 (48.9, 101)	69.9 (49, 97.5)	-1.93 (-7.84, 2.72)
Prevalence	1594270.2 (1102352.2, 2230720.6)	2553118.5 (1801191.2, 3534174.7)	60.14 (50.54, 69.19)		1848.2 (1279.9, 2567.9)	1851.9 (1305.8, 2562.2)	0.2 (-5.51, 6.07)
DALYs	13962.9 (6208.4, 29191.9)	22018.1 (9764.8, 46551.9)	57.69 (47.48, 66.91)		16.1 (7.1, 33.6)	16 (7.1, 33.8)	-0.73 (-6.76, 5.12)
Nicaragua
Incidence	1735.8 (1152, 2564.5)	3142.3 (2105.9, 4544)	81.03 (57.03, 108.33)		31 (20.7, 45.5)	42.8 (28.7, 62)	38.13 (20.19, 58.76)
Prevalence	29160.8 (19482.3, 42744.8)	82216.2 (54856.3, 117750.5)	181.94 (146.79, 222.81)		821.5 (552.5, 1201.5)	1134.9 (758.9, 1622.9)	38.15 (20.92, 57.38)
DALYs	256.1 (109, 540)	715.8 (312.5, 1548.8)	179.55 (141.29, 222.1)		7.2 (3.1, 15)	9.9 (4.3, 21.3)	37.6 (20.05, 58.32)
Panama
Incidence	828.2 (560.3, 1189.4)	1867.6 (1270.3, 2728.2)	125.51 (94.64, 169.42)		27.7 (18.7, 39.7)	43.9 (29.9, 64.2)	58.64 (36.96, 89.5)
Prevalence	18060.8 (12184.3, 26272.9)	50374.9 (34715.4, 73503.9)	178.92 (139.55, 231.73)		722.1 (487.6, 1052.8)	1151 (793.2, 1679.1)	59.4 (36.4, 90.38)
DALYs	156.9 (67.8, 341.2)	434.9 (188.5, 946.9)	177.24 (137.62, 225.07)		6.2 (2.7, 13.6)	9.9 (4.3, 21.6)	58.92 (35.74, 87.57)
Venezuela (Bolivarian Republic of)
Incidence	9396 (6312.3, 13845.5)	12226.4 (8482.9, 17618.2)	30.12 (10.86, 55.75)		38.6 (26, 56.7)	48.8 (33.9, 70.4)	26.41 (7.77, 51.19)
Prevalence	198150 (133657, 291208.7)	348798.1 (235439.8, 507764.3)	76.03 (50.8, 106.35)		1015.4 (684.9, 1484.9)	1324.3 (895.2, 1927.4)	30.43 (11.28, 52.52)
DALYs	1738.8 (752.4, 3689.7)	3027.9 (1318.1, 6350.5)	74.13 (50.12, 105.77)		8.9 (3.9, 18.9)	11.5 (5, 24.2)	30.11 (11.78, 54.83)
Andean Latin America
Incidence	25250.9 (17294.5, 36023.1)	42634.6 (29473.4, 60429.4)	68.84 (55.92, 84.57)		50 (34.4, 71)	64.7 (44.7, 91.9)	29.35 (19.52, 42.37)
Prevalence	466365.8 (322494, 653112.7)	1172864.5 (808337.4, 1649165.9)	151.49 (129.79, 175.33)		1230.4 (850.9, 1717.8)	1662.5 (1148.2, 2338.2)	35.12 (24.02, 47.98)
DALYs	4055.9 (1797.3, 8748.4)	10129.2 (4423.9, 21176.6)	149.74 (127.53, 174.94)		10.7 (4.8, 23)	14.4 (6.3, 30)	34.49 (22.66, 48.5)
Bolivia (Plurinational State of)
Incidence	3831.4 (2561.6, 5599.4)	7483 (5046.2, 10512.3)	95.31 (70.61, 135.1)		45.5 (30.5, 66)	59.6 (40.2, 83.8)	31.12 (14.53, 57.98)
Prevalence	69667.3 (46824.8, 100930.7)	189605 (127099.6, 268471.9)	172.16 (136.72, 218.48)		1146.5 (773.4, 1657.6)	1501.5 (1008.9, 2126)	30.96 (14.21, 53.98)
DALYs	606.2 (258.3, 1284.8)	1638.2 (713.7, 3514.5)	170.24 (136.16, 219.86)		9.9 (4.3, 21.1)	13 (5.6, 27.8)	30.26 (13.71, 54.59)
Ecuador
Incidence	7654.9 (5282.1, 10793.4)	14008.3 (9802.7, 19335.8)	83 (56.8, 113.22)		57.2 (39.5, 80.4)	74.5 (52.2, 102.8)	30.4 (11.93, 51.96)
Prevalence	145201.9 (101492.8, 204124.3)	355533.1 (250363.6, 492188.6)	144.85 (111.77, 182.02)		1437.3 (1001.2, 2016.3)	1873.1 (1317.6, 2589.4)	30.32 (12.62, 50.41)
DALYs	1265.5 (563.1, 2677.9)	3085.9 (1353.8, 6420)	143.85 (109.94, 181.99)		12.5 (5.6, 26.4)	16.2 (7.1, 33.8)	30.16 (12.3, 50.06)
Peru
Incidence	13764.6 (9421.5, 19660.7)	21143.2 (14330.3, 30538.9)	53.61 (35.05, 74.42)		48 (32.9, 68.3)	61.1 (41.3, 88.8)	27.37 (12.15, 44.78)
Prevalence	251496.6 (168297.9, 353836.1)	627726.4 (429269.9, 908335)	149.6 (119.6, 184.72)		1157.9 (774.4, 1627.9)	1611.1 (1102, 2330.3)	39.14 (23.15, 59.07)
DALYs	2184.2 (953.2, 4745.2)	5405.2 (2339.8, 11490)	147.47 (118.91, 183.26)		10 (4.4, 21.8)	13.9 (6, 29.5)	38.24 (22.48, 58.64)
Caribbean
Incidence	1979.8 (867.3, 4095.2)	11962.5 (8144.4, 16730.1)	29.65 (22.74, 36.69)		22.2 (15.2, 31.3)	27.4 (18.6, 38.6)	29.65 (22.74, 36.69)
Prevalence	222432.4 (149139.1, 319229.7)	360981.8 (245137.3, 520033.5)	62.29 (53.64, 71.43)		605.7 (408.2, 869.3)	746.2 (506.3, 1073.5)	62.29 (53.64, 71.43)
DALYs	1979.8 (867.3, 4095.2)	3161.5 (1381.5, 6647.6)	59.69 (50.73, 69)		5.4 (2.3, 11.1)	6.5 (2.9, 13.7)	59.69 (50.73, 69)
Antigua and Barbuda
Incidence	15.3 (10.4, 21.4)	21.7 (15, 30.6)	42.08 (20.84, 63.42)		22.7 (15.4, 31.8)	29.8 (20.5, 42.4)	30.97 (11.53, 50.31)
Prevalence	388.3 (260.9, 555.8)	765.4 (525.5, 1089.2)	97.11 (65.65, 127.14)		612.6 (412.1, 878.3)	801.1 (548.9, 1138.8)	30.76 (9.95, 49.52)
DALYs	3.4 (1.5, 7.1)	6.7 (3, 13.7)	94.88 (62.38, 124.31)		5.4 (2.3, 11.2)	7.1 (3.1, 14.5)	30.29 (8.4, 49.58)
Barbados
Incidence	72.2 (49.1, 103)	70.8 (48.6, 99.2)	-2 (-14.4, 12.52)		28.2 (18.9, 40.3)	32.8 (22.2, 46)	16.52 (1.67, 33.84)
Prevalence	2049.2 (1396.9, 2923.3)	2498.9 (1711.3, 3562.2)	21.94 (5.89, 40.09)		756.7 (517, 1078.3)	886.9 (603.2, 1267.9)	17.21 (1.61, 34.1)
DALYs	18.1 (8, 38.5)	21.9 (9.6, 46.9)	20.81 (4.27, 38.67)		6.7 (2.9, 14.2)	7.8 (3.4, 16.7)	16.86 (0.74, 34.61)
Belize
Incidence	58.9 (39.2, 84.2)	169.4 (116.9, 241.6)	187.61 (142.83, 234.26)		22.8 (15.5, 32.3)	33 (22.5, 47.4)	44.86 (23.9, 65.55)
Prevalence	1011.8 (674.8, 1425.3)	4130.1 (2832.1, 5831.1)	308.19 (246.66, 370.06)		578.1 (392.9, 812.6)	865.6 (594.3, 1222.4)	49.73 (27.49, 70.78)
DALYs	9.2 (4.1, 19.1)	36.9 (16.3, 78.7)	301.87 (238.89, 368.24)		5.2 (2.3, 10.9)	7.7 (3.4, 16.4)	48.36 (25.66, 71.04)
Bermuda
Incidence	15.3 (10.3, 21.7)	13.6 (9.4, 20)	-10.88 (-23.82, 0.9)		34.2 (22.5, 49.1)	38 (25.9, 56.2)	11.11 (-5.58, 25.53)
Prevalence	616.2 (407.8, 886.7)	542.8 (373.4, 787.3)	-11.92 (-24.97, -0.64)		909.4 (597.8, 1305.2)	1008.3 (692.6, 1469.7)	10.87 (-5.39, 25.22)
DALYs	5.4 (2.4, 11.4)	4.8 (2, 9.9)	-12.55 (-25.49, 0.21)		8.1 (3.5, 16.8)	8.9 (3.8, 18.5)	10.71 (-5.96, 27.11)
Bahamas
Incidence	89.6 (60.3, 129.5)	135.9 (92.3, 198.2)	51.71 (33.04, 75.55)		28.8 (19.3, 41.7)	34.7 (23.6, 50.7)	20.58 (5.75, 39.67)
Prevalence	2206.9 (1495, 3197.8)	3896.6 (2635.4, 5665.7)	76.56 (55.72, 105.01)		768.5 (523.7, 1110.3)	922.2 (623.3, 1340.3)	20.01 (5.93, 39.68)
DALYs	19.6 (8.4, 41.6)	34.3 (15.2, 73.5)	75 (53.59, 102.83)		6.8 (2.9, 14.3)	8.1 (3.6, 17.4)	19.83 (4.99, 39.05)
Cuba
Incidence	2691.7 (1839.6, 3792.9)	2304.1 (1570.7, 3215)	-14.4 (-26.61, -3.87)		24.3 (16.4, 34.5)	32 (21.6, 44.9)	31.67 (13.64, 49)
Prevalence	79178.2 (53235.8, 113090.9)	86670.3 (58800, 122862.3)	9.46 (-5.23, 22.58)		645.4 (433.2, 923.8)	840.3 (570.2, 1193.9)	30.2 (12.28, 46.12)
DALYs	701.8 (301.4, 1451.5)	759.9 (328.9, 1594.3)	8.29 (-6.99, 22.56)		5.7 (2.5, 11.8)	7.4 (3.2, 15.6)	30.19 (12.24, 47.66)
Dominica
Incidence	19.9 (13.5, 29)	19.5 (13.2, 27.5)	-1.72 (-14.96, 9.42)		21.7 (14.8, 31.7)	30.3 (20.3, 43.1)	39.35 (19.76, 55.36)
Prevalence	406.5 (272.6, 585.2)	537.7 (362.1, 773.6)	32.28 (13.28, 48.3)		568.3 (383.3, 815.3)	785.7 (529.1, 1132.2)	38.25 (18.2, 54.74)
DALYs	3.6 (1.6, 7.5)	4.8 (2.1, 10)	30.99 (11.84, 48.39)		5 (2.2, 10.4)	6.9 (3, 14.6)	38 (18.4, 56.06)
Dominican Republic
Incidence	1928.7 (1320.2, 2756.2)	3377.8 (2268.2, 4794.4)	75.13 (52.25, 102.26)		20.5 (14, 29.4)	31.1 (20.9, 44.4)	51.55 (31.59, 74)
Prevalence	39219 (26592.8, 56557.2)	95011 (64011.8, 139093.9)	142.26 (109.66, 178.1)		532.8 (363.9, 768.8)	804.7 (541.8, 1177.4)	51.03 (31.26, 73.07)
DALYs	352.9 (154.4, 720.3)	835.6 (354.6, 1732.2)	136.81 (102.79, 171.68)		4.8 (2.1, 9.7)	7.1 (3, 14.6)	48.47 (27.56, 70.86)
Grenada
Incidence	20.8 (14, 29.8)	24.8 (16.8, 34.6)	18.95 (-0.12, 35.95)		19.3 (13.1, 27.4)	26.7 (18, 37.6)	38.56 (18.02, 58.21)
Prevalence	401.9 (270.4, 575.2)	752.8 (504.5, 1071.7)	87.29 (58.34, 112.61)		505.8 (343.1, 725.6)	698.1 (467.7, 994.1)	38.01 (17.25, 57.41)
DALYs	3.6 (1.5, 7.4)	6.7 (3, 14.3)	85.75 (59.01, 113.82)		4.5 (1.9, 9.3)	6.2 (2.8, 13.2)	37.77 (17.72, 57.8)
Guyana
Incidence	209.1 (141.1, 302.2)	224 (152.8, 314.9)	7.14 (-7.43, 21.91)		20.4 (13.8, 29.3)	28.8 (19.5, 40.4)	41.33 (22.44, 61.14)
Prevalence	4332 (2907.7, 6408.3)	6222.8 (4190.3, 8892)	43.65 (24.35, 62.99)		530.1 (357.8, 780.3)	771.8 (519.9, 1103.8)	45.58 (25.89, 65.31)
DALYs	38.5 (16.5, 82.3)	54.8 (23.7, 117)	42.37 (21.13, 62.69)		4.7 (2, 10)	6.8 (2.9, 14.5)	44.98 (23.91, 65.38)
Haiti
Incidence	1259.8 (835.6, 1841)	2845.3 (1961.2, 4082.8)	125.86 (94.48, 156.13)		15.8 (10.6, 23)	19 (13.2, 27.3)	20.64 (4.51, 36.96)
Prevalence	24703.6 (16351.2, 36055.7)	69762.8 (47737.7, 98320.6)	182.4 (141.06, 221.36)		412.8 (274.2, 601.2)	504.9 (346.1, 711.5)	22.3 (5.27, 39.77)
DALYs	219.2 (96.3, 474.9)	601.7 (260.2, 1266.1)	174.53 (132.92, 222.89)		3.6 (1.6, 7.9)	4.3 (1.9, 9.1)	19.52 (1.43, 40.52)
Jamaica
Incidence	667.6 (451.8, 932.2)	753.7 (513.6, 1060)	12.9 (-3.13, 27.88)		22 (14.9, 30.7)	29 (19.5, 40.8)	31.68 (12.64, 48.72)
Prevalence	13820.9 (9276.3, 19517.9)	23878.3 (16204.9, 34305.6)	72.77 (46.23, 96.98)		584 (394.2, 826.1)	774.9 (525.3, 1114.7)	32.69 (12.83, 51.65)
DALYs	123.6 (53.7, 259.1)	211.3 (90.3, 449.9)	71.01 (43.37, 97.56)		5.2 (2.2, 10.8)	6.9 (2.9, 14.6)	32.38 (11.6, 53.08)
Puerto Rico
Incidence	1329.9 (894.8, 1887.7)	972.6 (656.8, 1399.2)	-26.87 (-34.74, -17.4)		33.7 (22.7, 47.9)	42.8 (29, 61.4)	27.11 (14.27, 43.83)
Prevalence	34342.6 (23181.7, 49212.8)	34174.4 (22806.9, 49848)	-0.49 (-9.92, 11.45)		923.9 (623.9, 1325.7)	1158.3 (770.5, 1695.1)	25.38 (13.38, 40.41)
DALYs	304.4 (128.3, 644.7)	300.4 (133, 623.4)	-1.33 (-11.7, 10.97)		8.2 (3.4, 17.3)	10.2 (4.5, 21.2)	24.92 (11.45, 40.08)
Saint Kitts and Nevis
Incidence	13.1 (8.9, 18.6)	15.5 (10.8, 22.3)	17.84 (0.9, 33.04)		25.8 (17.6, 36.6)	35 (23.8, 51.1)	35.76 (15.9, 53.01)
Prevalence	274.2 (186.8, 389.6)	572.4 (390.3, 832.6)	108.71 (77.94, 137.61)		676.9 (461.8, 959.4)	907 (616, 1314.9)	34 (14.59, 51.23)
DALYs	2.4 (1.1, 5.1)	5 (2.2, 10.4)	105.93 (75.25, 135.04)		6 (2.6, 12.4)	8 (3.6, 16.6)	33.85 (14.19, 52.74)
Saint Lucia
Incidence	39.5 (26.6, 56.2)	37.6 (26, 52.9)	-4.58 (-15.06, 9.13)		21.7 (14.8, 30.7)	28.1 (19.1, 39.9)	29.83 (15.96, 49.29)
Prevalence	774.2 (521.2, 1099.5)	1377.3 (942.3, 1928.7)	77.89 (59.76, 103.71)		573 (387.6, 814.5)	740.3 (504.2, 1040.1)	29.2 (15.09, 46.83)
DALYs	6.9 (3, 14.5)	12.1 (5.3, 25.4)	75.07 (55.05, 100.83)		5.1 (2.2, 10.6)	6.5 (2.9, 13.6)	29.02 (14.37, 47.48)
Saint Vincent and the Grenadines
Incidence	29.6 (19.7, 42.2)	29.8 (20, 42.1)	0.49 (-15.89, 12.67)		19.5 (13, 27.5)	29 (19.5, 41.1)	48.88 (25.42, 67.78)
Prevalence	547.9 (366.8, 784.8)	862.9 (583.3, 1233)	57.49 (31.02, 77.92)		504.4 (338.4, 717)	757.3 (511.7, 1081.8)	50.14 (25.28, 69.05)
DALYs	4.9 (2.1, 10.6)	7.6 (3.4, 16.4)	55.11 (28.18, 76.08)		4.5 (1.9, 9.6)	6.7 (3, 14.4)	49.68 (24.73, 69.05)
Suriname
Incidence	103.7 (70.5, 147.5)	165.8 (112.6, 234.3)	59.9 (39.81, 83.26)		22.1 (15, 31.5)	29.7 (20.1, 41.9)	34.26 (16.87, 53.67)
Prevalence	2303 (1551.5, 3269.2)	4686.8 (3190.6, 6702.6)	103.51 (78.31, 131.91)		579 (391.9, 817.4)	805.5 (547.4, 1150.9)	39.13 (21.79, 58.96)
DALYs	20.5 (8.8, 43)	41.2 (18.1, 87.9)	101.2 (75.93, 131.96)		5.1 (2.2, 10.7)	7.1 (3.1, 15.1)	38.79 (20.72, 59.24)
Trinidad and Tobago
Incidence	310.8 (208.3, 444.7)	352.3 (235.9, 505.3)	13.35 (1.13, 28.9)		22.4 (15, 32)	32.1 (21.4, 46.2)	43.43 (27.66, 61.96)
Prevalence	7329.5 (4915.3, 10354)	11664.3 (7830.9, 16720.3)	59.14 (40.91, 80.09)		585.4 (394.2, 823.9)	841.8 (567.9, 1211)	43.79 (27.32, 61.96)
DALYs	65.9 (28.5, 138.9)	102.2 (44.7, 212)	55.02 (35.96, 79.36)		5.2 (2.3, 11)	7.4 (3.2, 15.4)	41.55 (24.21, 61.65)
United States Virgin Islands
Incidence	38.7 (26.3, 56.6)	23.5 (15.8, 33.8)	-39.39 (-46.31, -31.52)		32.9 (22.4, 48)	41.5 (27.8, 59.7)	25.83 (12.13, 41.18)
Prevalence	994.4 (669.8, 1462.6)	758.4 (504.9, 1082.8)	-23.73 (-31.77, -15.11)		902.8 (608.7, 1328.1)	1107.8 (737.1, 1588)	22.7 (9.43, 37.27)
DALYs	8.8 (3.8, 18.9)	6.6 (2.9, 14.2)	-24.42 (-33.22, -15.11)		8 (3.5, 17.1)	9.8 (4.3, 20.9)	22.17 (8.28, 37.6)
Tropical Latin America
Incidence	22284.6 (15199.8, 32004)	23769.1 (16611.4, 32960.1)	6.66 (-0.26, 13.5)		11.7 (8, 16.7)	12.3 (8.4, 17.2)	5 (0.43, 10.38)
Prevalence	448844.2 (304409, 647659.2)	746471.7 (514677, 1057462.8)	66.31 (57.21, 75.3)		283.9 (192.7, 407.2)	308.2 (211.9, 438.9)	8.56 (3.54, 14.09)
DALYs	4011.1 (1701.1, 8427.3)	6557.7 (2825.1, 13831)	63.49 (54.8, 72.88)		2.5 (1.1, 5.3)	2.7 (1.2, 5.7)	7.48 (2.5, 13.07)
Brazil
Incidence	21914.2 (14946, 31482.5)	22886.1 (16023.8, 31692.7)	4.43 (-2.57, 11.18)		11.8 (8.1, 16.8)	12.3 (8.5, 17.3)	4.29 (-0.49, 9.6)
Prevalence	441561.6 (299562.3, 637038.3)	723408.1 (499293.6, 1022776.7)	63.83 (55.04, 72.67)		286.1 (194.3, 410.4)	308.5 (212.3, 438.6)	7.82 (2.79, 13.49)
DALYs	3946.4 (1673.2, 8285.8)	6354.9 (2741, 13399.7)	61.03 (52.4, 70.38)		2.5 (1.1, 5.4)	2.7 (1.2, 5.7)	6.75 (1.61, 12.41)
Paraguay
Incidence	370.4 (247.4, 553.8)	883 (607.8, 1278.3)	138.41 (99.94, 173.21)		7.4 (5.1, 11)	11.3 (7.8, 16.4)	52.48 (29.34, 72.59)
Prevalence	7282.5 (4831.7, 10880.8)	23063.6 (15598.9, 33566.2)	216.7 (166.59, 264.38)		191.5 (128.9, 283.9)	297.3 (201.4, 431.9)	55.24 (32.05, 76.69)
DALYs	64.7 (26.7, 137.7)	202.8 (86, 422.9)	213.36 (162.7, 266.86)		1.7 (0.7, 3.6)	2.6 (1.1, 5.4)	54.14 (29.79, 82.17)
East Asia
Incidence	218485.8 (154343.7, 301132.9)	268458.5 (190157.1, 373877.4)	22.87 (10.26, 35.34)		15.6 (11.1, 21.8)	27.3 (19.2, 38.4)	75.02 (62.37, 86.34)
Prevalence	5607180.9 (3957250.2, 7863221.6)	10490358.5 (7423407.5, 14808757.1)	87.09 (75.09, 98.72)		408.1 (290, 572.2)	740.8 (519.6, 1039.3)	81.5 (70.23, 93.05)
DALYs	48225.9 (20818.6, 100143)	89991.4 (39441.8, 185701.9)	86.6 (74.68, 98.29)		3.5 (1.5, 7.3)	6.4 (2.8, 13.2)	82.86 (71.06, 94.3)
China
Incidence	208205.9 (146809.4, 286886.8)	258930 (183411.6, 361501.1)	24.36 (11.25, 37.66)		15.3 (10.9, 21.4)	27.3 (19.2, 38.3)	77.84 (64.35, 89.84)
Prevalence	5335329.9 (3760542.1, 7501008.8)	10077520 (7120017.1, 14249277.3)	88.88 (76.21, 100.77)		401.4 (284.7, 563.5)	738.4 (517.7, 1038.4)	83.96 (71.66, 96.08)
DALYs	45869.7 (19805.3, 95340.8)	86443 (37911.1, 178421.1)	88.45 (75.64, 100.51)		3.4 (1.5, 7.2)	6.4 (2.8, 13.2)	85.42 (72.81, 97.55)
Democratic People’s Republic of Korea
Incidence	3817.4 (2734.7, 5404.8)	3897.4 (2717.1, 5421.3)	2.1 (-10.56, 15.07)		18.2 (13, 25.8)	18.7 (12.9, 26.1)	2.91 (-10.17, 16.36)
Prevalence	99897.4 (70129.4, 144887)	131299.5 (90384.9, 184878)	31.43 (14.53, 48.57)		459 (322.5, 665.8)	468 (322.2, 657.7)	1.95 (-11.24, 15.57)
DALYs	866.8 (363.9, 1818.7)	1132 (485.5, 2360.3)	30.59 (13.08, 48.41)		4 (1.7, 8.3)	4 (1.7, 8.5)	1.86 (-11.62, 15.76)
Taiwan (Province of China)
Incidence	6462.5 (4389.3, 9193)	5631.1 (4047.9, 7549.9)	-12.87 (-26.39, 4.12)		29.1 (19.7, 41.6)	46.3 (33.3, 62.7)	58.92 (35.05, 91.47)
Prevalence	171953.6 (115344.3, 249042.5)	281539 (199611.4, 384540.6)	63.73 (37.83, 94.84)		753.2 (505.8, 1091.6)	1220.9 (864, 1666.2)	62.09 (37.18, 92.98)
DALYs	1489.3 (643.2, 3185.5)	2416.4 (1055.8, 4838.8)	62.25 (37.16, 95.02)		6.5 (2.8, 13.9)	10.5 (4.6, 21.1)	61.73 (37.46, 95.51)
Southeast Asia
Incidence	174333.2 (122499, 243431.4)	357262.3 (254498.6, 495461.4)	185.64 (166.63, 205.02)		29.3 (20.6, 40.8)	53.6 (37.9, 74.9)	82.8 (69.3, 97.25)
Prevalence	3682948.8 (2589198.8, 5201509.9)	10520027.7 (7378813.9, 14809823.5)	185.64 (166.63, 205.02)		773.1 (546.2, 1094.3)	1404.1 (984.5, 1974.7)	81.61 (68.92, 94.86)
DALYs	32853.8 (14429.1, 66791.8)	92605.7 (41149, 191024.1)	181.87 (162.32, 202.42)		6.9 (3, 14)	12.4 (5.5, 25.5)	80.53 (68.47, 93.64)
Cambodia
Incidence	3037.1 (2079.7, 4318.2)	7003.9 (4910.4, 9987.2)	130.61 (105.15, 160.96)		23.3 (16, 33.1)	38.2 (26.8, 54.5)	63.68 (45.29, 83.73)
Prevalence	58608 (40480.7, 83500.4)	183686.4 (127720.3, 263849.3)	213.42 (179.24, 254.49)		638 (441.8, 914)	1008.5 (703.5, 1446.8)	58.07 (40.89, 78.69)
DALYs	510.7 (224.8, 1012.5)	1597.1 (708.3, 3275.5)	212.76 (175.18, 253.09)		5.5 (2.4, 10.9)	8.8 (3.9, 17.9)	58.81 (40.37, 79.77)
Indonesia
Incidence	69135.7 (48494.5, 95776.8)	143576.9 (102491.9, 199866.7)	107.67 (93.9, 122.52)		28.9 (20.3, 39.8)	53.9 (38.1, 75.3)	86.54 (72.32, 101.65)
Prevalence	1447748.8 (1023213.1, 2041964.1)	4368497.5 (3082597, 6153283.6)	201.74 (182.13, 223.85)		758.7 (537.2, 1071.1)	1411.7 (995.6, 1990.6)	86.08 (72.78, 101.09)
DALYs	12935.4 (5663.4, 26428.7)	38469 (17224.5, 79270.5)	197.39 (176.57, 218.8)		6.7 (3, 13.7)	12.5 (5.6, 25.7)	84.99 (71.37, 99.43)
Lao People’s Democratic Republic
Incidence	1393.5 (968.1, 1968.5)	3823 (2706.7, 5367.5)	174.34 (139.96, 206.83)		26.1 (18.1, 36.9)	47 (33.4, 65.7)	79.93 (56.59, 103.44)
Prevalence	25492.2 (17804.2, 35868.7)	97477.7 (68813, 140227)	282.38 (236.82, 330.43)		679.8 (476.5, 955.1)	1207.4 (852.4, 1736.7)	77.62 (55.94, 100.8)
DALYs	226.7 (99.7, 464)	860.5 (384.6, 1767.2)	279.6 (229.71, 333.06)		6 (2.7, 12.3)	10.6 (4.8, 21.9)	77.24 (54.7, 103.84)
Malaysia
Incidence	9973.1 (7015, 14166.1)	23814.4 (16714.1, 33137.2)	138.79 (106.62, 172.67)		46.2 (32.7, 65.6)	78.5 (54.9, 110)	70.09 (45.36, 94.88)
Prevalence	216826 (152245.2, 312869.4)	701853.9 (489841.8, 1003730.5)	223.69 (180.12, 267.27)		1189.5 (839.9, 1716.6)	1961.1 (1368.2, 2794.9)	64.87 (41.75, 87.17)
DALYs	1885.9 (810.5, 3797.2)	6067.7 (2694.9, 12347.3)	221.74 (178.74, 265.64)		10.3 (4.4, 20.8)	17 (7.5, 34.5)	64.53 (41.7, 87.03)
Maldives
Incidence	78.6 (54.3, 109.9)	227 (158.2, 323.3)	188.58 (151.36, 231.12)		27.1 (18.8, 37.7)	60.9 (42.3, 87)	125.23 (94.68, 161.28)
Prevalence	1359.9 (935.1, 1912.1)	7696.1 (5304.2, 11085.8)	465.94 (394.52, 540.89)		701 (486.4, 981.2)	1184.6 (805.9, 1709.1)	68.98 (47.35, 95.4)
DALYs	12.2 (5.3, 25.1)	67.9 (29.9, 147.1)	455.86 (381.06, 542.27)		6.2 (2.7, 12.7)	10.5 (4.6, 22.9)	69.37 (47.04, 97.28)
Mauritius
Incidence	568.9 (403.6, 806.5)	699.3 (496.5, 976.9)	22.92 (7.31, 39.89)		45.2 (32.2, 64.4)	72.8 (51.2, 103.1)	61.28 (39.58, 85.63)
Prevalence	14185.8 (9948.4, 20580.4)	24029.6 (16784.2, 34202)	69.39 (47.04, 94.33)		1157 (810.5, 1682.8)	1865.2 (1307.4, 2663.9)	61.21 (39.51, 85.18)
DALYs	124.6 (55.9, 254.1)	209.5 (91.9, 440.7)	68.11 (45.43, 94.36)		10.1 (4.5, 20.6)	16.3 (7.2, 34.4)	60.96 (39.02, 85.88)
Myanmar
Incidence	12441.1 (8652.8, 17736.6)	29204.4 (20728.6, 41144.1)	134.74 (104.98, 167.83)		23.9 (16.6, 33.9)	48.7 (34.7, 68.4)	104.11 (78.02, 133.16)
Prevalence	253072.2 (176756.8, 364161.1)	758041.4 (531570.9, 1064624.7)	199.54 (159.69, 243.56)		615.3 (427.7, 884.4)	1279.9 (897.4, 1797.8)	108.01 (80.46, 137.42)
DALYs	2248.1 (978.6, 4728.8)	6698.3 (2972, 13839.5)	197.96 (158.52, 242.62)		5.4 (2.4, 11.4)	11.3 (5, 23.3)	108.27 (81.45, 138.62)
Philippines
Incidence	26279.1 (18450.4, 36644.5)	67789 (48104.5, 94089.4)	157.96 (143.19, 173.1)		31.8 (22.4, 44.1)	52.9 (37.6, 73.7)	66.44 (56.14, 77.61)
Prevalence	512458.3 (356796.3, 724345.5)	1658829.5 (1159118.3, 2353345.3)	223.7 (205.02, 243.27)		819.6 (572.7, 1162.3)	1368 (955.7, 1941.1)	66.92 (57.19, 77.33)
DALYs	4532.1 (1954.7, 9278)	14741.1 (6394.4, 30412)	225.26 (206.17, 245.01)		7.2 (3.1, 14.7)	12.1 (5.3, 25)	68.23 (58.32, 78.63)
Sri Lanka
Incidence	7533 (5285.3, 10701.1)	12914.9 (9127.4, 17884.3)	71.45 (50.27, 95.14)		36.5 (25.6, 51.9)	61.6 (43.4, 85.6)	68.75 (48.3, 92.94)
Prevalence	175610.9 (124012.7, 251375)	360441.9 (254149.6, 503919.1)	105.25 (81.48, 134.17)		947.1 (667.3, 1358.7)	1620.5 (1143.1, 2263.9)	71.09 (51.17, 95.36)
DALYs	1573.1 (701.4, 3282.8)	3158.7 (1399.8, 6284.4)	100.8 (76.38, 132.86)		8.5 (3.8, 17.6)	14.2 (6.3, 28.3)	68.29 (47.84, 94.45)
Seychelles
Incidence	42.8 (30.3, 60.9)	58.3 (40.9, 81.7)	36.12 (17.81, 55.07)		48.4 (34.2, 68.6)	67.7 (47.4, 95)	39.8 (21.87, 59.34)
Prevalence	912.7 (639.2, 1305.8)	1728.2 (1206.9, 2450.3)	89.35 (65.01, 115.65)		1213 (849.9, 1735.6)	1587.6 (1107.9, 2255.6)	30.89 (14.19, 49.16)
DALYs	8.1 (3.6, 16.6)	15.1 (6.7, 31.3)	87.13 (61.65, 114.81)		10.7 (4.7, 21.9)	14 (6.2, 28.9)	30.77 (13.18, 49.33)
Thailand
Incidence	23969.7 (16703.8, 33793.6)	29435 (20972.9, 41107.5)	22.8 (8.4, 38.3)		34.6 (24.2, 48.8)	66.9 (47.4, 93.5)	93.52 (69.53, 119.78)
Prevalence	576816.3 (403601.4, 825251.6)	1145788.1 (805847.9, 1629052.6)	98.64 (75.3, 123.95)		903.8 (630.8, 1294.7)	1775.4 (1239, 2523.9)	96.44 (73.39, 123)
DALYs	5259.4 (2313.2, 10700.8)	10121.7 (4512.3, 21216.9)	92.45 (68.39, 120.37)		8.2 (3.6, 16.8)	15.8 (7, 33.3)	92.4 (68.81, 121.15)
Timor-Leste
Incidence	204.4 (142.6, 287.5)	744.4 (529.5, 1074.7)	264.25 (221.38, 313.51)		22.7 (15.9, 32)	39.1 (28, 56.8)	71.79 (51.63, 94.13)
Prevalence	4651.3 (3242.3, 6531.9)	14238.9 (10026.9, 20540.7)	206.13 (170.82, 247.13)		602.9 (420.4, 845.5)	1032.5 (724.1, 1498.5)	71.25 (51.51, 93.66)
DALYs	41.4 (18.5, 84.8)	127.3 (55.3, 257.8)	207.3 (170.65, 246.93)		5.3 (2.4, 11)	9.2 (4, 18.5)	71.66 (52.02, 93.1)
Viet Nam
Incidence	19424 (13530.1, 27008.8)	37473.6 (26110.7, 52256.8)	92.92 (67.97, 116.84)		22.4 (15.6, 31.1)	43.8 (30.6, 61.3)	95.03 (70.01, 118.06)
Prevalence	389878.8 (269102.8, 551551.2)	1183045.2 (824669.3, 1688238.3)	203.44 (166.99, 239.29)		593.5 (409.1, 835.1)	1117.9 (779, 1591.2)	88.34 (65.27, 112.6)
DALYs	3448.5 (1514.7, 7169.1)	10342.5 (4400.2, 21620.4)	199.91 (158.66, 242.2)		5.2 (2.3, 10.8)	9.8 (4.2, 20.4)	88.28 (61.89, 114.66)
Oceania
Incidence	2013.1 (1401.2, 2847)	5300.9 (3692.1, 7439.8)	163.31 (136.75, 185.25)		23.8 (16.7, 33.5)	32.9 (23, 46.3)	38.56 (25.1, 50.15)
Prevalence	40226.7 (27505, 56891.6)	124484.3 (86570.2, 177516.4)	209.46 (178.55, 236.12)		621.1 (428.1, 873.4)	870.3 (605, 1243.3)	40.12 (26.55, 52.1)
DALYs	352.2 (160.6, 738.9)	1083.5 (471.3, 2285.6)	207.65 (175.84, 238.86)		5.4 (2.5, 11.3)	7.6 (3.3, 15.9)	39.8 (26.15, 52.32)
American Samoa
Incidence	22 (15.5, 30.8)	31.4 (21.7, 45.9)	42.75 (24.76, 59.39)		37.2 (26.2, 52.2)	52 (36.2, 75.8)	39.74 (22.1, 55.72)
Prevalence	490.6 (341.6, 691.2)	662.3 (463.1, 968.6)	35.01 (19.1, 50.84)		989 (687, 1397)	1368.2 (952.6, 1998.6)	38.34 (22.32, 54.22)
DALYs	4.3 (1.9, 9)	5.8 (2.5, 12.2)	33.36 (16.58, 49.86)		8.7 (3.8, 18.2)	12 (5.2, 25.3)	37.68 (20.7, 54.13)
Cook Islands
Incidence	9.3 (6.3, 13.5)	9.8 (6.8, 14.1)	5.21 (-9.57, 17.41)		38.9 (26.3, 56.1)	60.5 (41.9, 87.7)	55.69 (34.39, 73.4)
Prevalence	193.1 (133.4, 279.4)	269 (183.7, 390.8)	39.25 (20.65, 54.71)		1006.9 (694.7, 1459.7)	1649.5 (1126.7, 2398.2)	63.82 (41.71, 82.02)
DALYs	1.7 (0.7, 3.6)	2.3 (1, 5)	37.97 (20.41, 54.57)		8.8 (3.9, 18.7)	14.4 (6.4, 30.9)	63.17 (42.21, 83.04)
Micronesia (Federated States of)
Incidence	42.2 (29.1, 60.2)	51.2 (35.9, 72)	21.42 (7.72, 39.7)		28.4 (19.9, 40.4)	41 (28.7, 57.9)	44.37 (27.26, 65.58)
Prevalence	708.2 (486.8, 1007.4)	1147.4 (803.5, 1639.4)	62.02 (42.46, 83.77)		731.7 (507.5, 1032.9)	1056 (738.5, 1503.7)	44.32 (26.37, 64.06)
DALYs	6.3 (2.8, 13)	10.1 (4.5, 20.7)	61.18 (41.17, 83.86)		6.4 (2.9, 13.3)	9.3 (4.1, 19.1)	44.01 (26.5, 63.21)
Fiji
Incidence	290.6 (200.6, 417.8)	447.1 (310.5, 643.1)	53.85 (34.9, 77.95)		30.2 (21.1, 43.5)	46.4 (32.2, 66.4)	53.36 (34.28, 76.98)
Prevalence	6362.6 (4369.5, 9176.7)	11366.1 (7891.7, 16307.8)	78.64 (57.03, 104.59)		794.6 (546.9, 1147)	1199.8 (833.1, 1721.7)	50.99 (32.91, 72.91)
DALYs	56.4 (24.8, 115.2)	100.1 (44.4, 204.4)	77.43 (56.47, 106.18)		7 (3.1, 14.3)	10.6 (4.7, 21.6)	50.67 (32.86, 74.51)
Guam
Incidence	58.5 (40, 83.6)	82.3 (57, 115.8)	40.73 (26.25, 66.88)		41.3 (28, 59.7)	59.2 (40.7, 83.5)	43.33 (28.61, 70.26)
Prevalence	1572.9 (1079.4, 2236.5)	2285.7 (1572.9, 3261.9)	45.32 (31.58, 71.97)		1010.3 (694.5, 1439.1)	1511.9 (1040.6, 2159.7)	49.65 (35.49, 76.92)
DALYs	13.8 (6, 28.7)	20 (8.9, 41.8)	44.52 (28.58, 71.18)		8.9 (3.8, 18.4)	13.2 (5.8, 27.6)	49.46 (33.34, 76.25)
Kiribati
Incidence	22.5 (15.5, 31.3)	56 (39.1, 79.2)	148.35 (116.83, 185.82)		26 (18, 36.2)	38.9 (27.4, 54.8)	49.48 (30.24, 72)
Prevalence	517.9 (350.2, 735.5)	1307.9 (912.9, 1839.8)	152.56 (120.85, 190.01)		697.9 (472.8, 992.3)	1040.6 (727.8, 1462.2)	49.12 (30.58, 71.32)
DALYs	4.5 (2, 9.6)	11.5 (5.1, 23.7)	151.89 (117.16, 188.84)		6.1 (2.7, 12.9)	9.1 (4, 18.8)	49.27 (29.06, 71.41)
Marshall Islands
Incidence	14.4 (9.7, 20.9)	25.2 (17.6, 35.1)	74.84 (46.47, 101.44)		22.2 (15.3, 31.6)	37.8 (26.4, 52.7)	70.38 (46.96, 95.91)
Prevalence	233.3 (160.1, 336.4)	590.4 (408, 824.1)	153.11 (115.68, 190.99)		565.1 (388.2, 813.9)	960.2 (663.5, 1341.3)	69.91 (44.91, 96.05)
DALYs	2.1 (0.9, 4.3)	5.2 (2.2, 10.8)	150.78 (116.11, 190.23)		5 (2.2, 10.4)	8.4 (3.6, 17.6)	69.25 (46.56, 96.36)
Nauru
Incidence	4.1 (2.8, 5.9)	6.6 (4.6, 9.4)	59.54 (37.24, 81.81)		33.4 (23, 47.4)	47.5 (33.2, 67.7)	42.24 (23.23, 62.2)
Prevalence	86 (59.5, 122.4)	145.7 (101.6, 211.3)	69.48 (44.62, 92.53)		850.5 (589, 1218)	1257 (876, 1828.3)	47.79 (26.25, 67.44)
DALYs	0.8 (0.3, 1.6)	1.3 (0.6, 2.6)	69.15 (44.94, 95.01)		7.4 (3.3, 15.7)	11 (4.8, 22.8)	47.45 (26.69, 70.28)
Niue
Incidence	0.9 (0.6, 1.3)	0.8 (0.6, 1.2)	-9.69 (-20.87, 4.84)		34 (23, 48.3)	51.3 (35.8, 73.7)	50.86 (32.52, 74.36)
Prevalence	19.2 (13.1, 27.4)	22.4 (15.7, 32.1)	16.74 (2.83, 34.47)		922.9 (628.8, 1315.4)	1423.8 (993, 2040.6)	54.27 (35.58, 76.93)
DALYs	0.2 (0.1, 0.3)	0.2 (0.1, 0.4)	16.11 (1.88, 33.59)		8.1 (3.5, 16.8)	12.4 (5.6, 26)	53.99 (35.28, 77.34)
Northern Mariana Islands
Incidence	19.8 (13.5, 27.7)	24 (16.5, 34)	21.27 (6.46, 39.32)		44.1 (30, 62.6)	51.3 (35.6, 72.5)	16.49 (1.37, 31.41)
Prevalence	590.6 (406.7, 833)	627 (431.9, 881.1)	6.15 (-6.66, 20.84)		1005.3 (692.1, 1418.9)	1299.3 (892.5, 1827.9)	29.25 (13.41, 47.51)
DALYs	5.2 (2.3, 11.2)	5.5 (2.4, 11.6)	5.1 (-6.4, 19.43)		8.8 (3.9, 18.9)	11.4 (5, 24.1)	28.74 (13.73, 46.09)
Palau
Incidence	6.8 (4.7, 9.8)	7.5 (5.2, 10.8)	10.16 (-2.53, 22.71)		37.5 (25.6, 54.2)	54.3 (37, 78.4)	44.93 (28.4, 61.6)
Prevalence	164.6 (114.1, 234.9)	218.2 (150.7, 312)	32.58 (17.55, 46.31)		957.9 (663.3, 1367)	1194.2 (823.2, 1711.3)	24.66 (10.78, 37.72)
DALYs	1.4 (0.6, 3.1)	1.9 (0.8, 3.9)	31.01 (15.29, 45.61)		8.4 (3.7, 17.8)	10.4 (4.6, 21.2)	24.56 (8.88, 38.48)
Papua New Guinea
Incidence	1103.1 (754.7, 1549.9)	3693.1 (2565.9, 5174)	234.79 (186.58, 283.47)		20.9 (14.4, 29.2)	30.4 (21.2, 42.8)	45.72 (25.1, 65.3)
Prevalence	21657.4 (14767.1, 30423.6)	86753.7 (60039.6, 124936.9)	300.57 (239.93, 355.44)		537 (367.8, 752.1)	803 (556.1, 1160)	49.53 (27.4, 70.58)
DALYs	188.4 (83.8, 397.7)	752.7 (326.3, 1588.1)	299.57 (235.96, 355.33)		4.6 (2.1, 9.8)	7 (3, 14.7)	49.74 (26.5, 69.25)
Samoa
Incidence	79.6 (54.3, 116.2)	118.7 (81.8, 171.5)	49.14 (29.29, 71.57)		32.3 (22.1, 46.8)	45.8 (31.5, 65.7)	41.72 (22.98, 62.52)
Prevalence	1348 (917.9, 1950.2)	2401.5 (1649.7, 3416.9)	78.15 (56.06, 103.75)		856.1 (582, 1245.3)	1178.9 (813.5, 1680.5)	37.7 (20.78, 56.88)
DALYs	11.9 (5.1, 24.2)	21.1 (9.5, 44.1)	77.36 (56.39, 104.02)		7.5 (3.2, 15.3)	10.3 (4.6, 21.7)	37.66 (20.85, 58.8)
Solomon Islands
Incidence	104.7 (71.9, 150.1)	293.6 (200.7, 414.4)	180.46 (139.26, 218.52)		21.9 (15.2, 31.1)	34.1 (23.4, 48.2)	56.14 (34.15, 77.29)
Prevalence	1749.2 (1183.5, 2527.9)	6327.7 (4382.9, 8803.6)	261.74 (205.14, 308.06)		567.6 (387.2, 819.8)	911.3 (631.2, 1266.2)	60.56 (36.72, 81.55)
DALYs	15.4 (6.8, 32.3)	55.5 (24.6, 118.6)	259.46 (203.37, 308.05)		5 (2.2, 10.4)	8 (3.5, 17)	60.28 (36.37, 80.99)
Tokelau
Incidence	0.6 (0.4, 0.8)	0.7 (0.5, 1.1)	33.55 (15.25, 51.91)		29.3 (20.3, 42)	47.5 (32.9, 67.8)	62.36 (40.22, 83.79)
Prevalence	11.4 (7.9, 16.4)	17.1 (11.8, 24.4)	49.48 (29.83, 68.35)		813.3 (564.5, 1164.8)	1280.6 (883.1, 1830.7)	57.45 (36.26, 76.87)
DALYs	0.1 (0, 0.2)	0.1 (0.1, 0.3)	48.48 (28.8, 67.32)		7.1 (3.1, 14.9)	11.2 (5.1, 23.2)	57.14 (36.8, 76.79)
Tonga
Incidence	53.5 (36.3, 76.6)	66.7 (45.4, 96.4)	24.7 (7.76, 38.61)		38.1 (26.1, 54.3)	52.1 (35.6, 75.1)	36.99 (18.58, 52.54)
Prevalence	928.2 (635.5, 1354.7)	1428.9 (977.5, 2032)	53.95 (32.85, 70.88)		1045.6 (716.2, 1528)	1440.6 (984, 2048.3)	37.78 (18.97, 53.97)
DALYs	8.2 (3.6, 16.7)	12.5 (5.5, 25.8)	53.24 (31.33, 71.56)		9.1 (4, 18.8)	12.6 (5.5, 25.9)	37.61 (18.87, 53.85)
Tuvalu
Incidence	2.7 (1.9, 3.9)	5.9 (4.1, 8.4)	115.19 (83.14, 145.55)		28.4 (19.6, 40.2)	43 (29.8, 61)	51.5 (29.12, 73.58)
Prevalence	73.1 (50.9, 103.6)	138.6 (95.3, 198.1)	89.72 (62.38, 118.42)		802.9 (560.1, 1139.2)	1096.8 (756, 1563.8)	36.61 (17.03, 57.38)
DALYs	0.6 (0.3, 1.3)	1.2 (0.6, 2.6)	89.85 (63.2, 116.43)		7 (3.1, 14.5)	9.6 (4.4, 20.3)	36.68 (17.5, 55.83)
Vanuatu
Incidence	49.4 (34.4, 70.8)	142.4 (96.9, 206)	188.07 (152.93, 227.73)		25.4 (17.8, 36)	37.7 (25.7, 54.4)	48.65 (30.36, 69.04)
Prevalence	954.3 (660.6, 1368.2)	3185.8 (2156.2, 4658.9)	233.84 (192.22, 277.81)		665.9 (460.3, 955.4)	1009.7 (685.3, 1476.6)	51.62 (33.14, 71.62)
DALYs	8.4 (3.7, 17.2)	28 (12.4, 59.9)	232.83 (188.48, 284.26)		5.8 (2.6, 11.9)	8.8 (3.9, 18.8)	51.44 (31.91, 75.64)
North Africa and Middle East
Incidence	128593.5 (88937.3, 183308.6)	242427.1 (171058.1, 342784.6)	88.52 (79.82, 98.46)		28.7 (20.1, 40.6)	37.3 (26.3, 52.8)	29.73 (23.43, 35.91)
Prevalence	2463301.1 (1707181.3, 3501813.4)	6673431.5 (4672056.3, 9434543.5)	170.91 (157.81, 185)		754.3 (523, 1071.5)	990.2 (693.3, 1399.1)	31.28 (24.31, 37.86)
DALYs	22386.5 (9812.9, 47102.6)	59116.3 (26476.8, 125706.8)	164.07 (148.49, 178.24)		6.8 (3, 14.3)	8.8 (3.9, 18.7)	29.13 (21.62, 36.66)
Afghanistan
Incidence	2494.4 (1724.3, 3519.3)	10509.1 (7174.6, 15049.5)	321.3 (270.5, 382.02)		17.6 (12.3, 24.6)	24.2 (16.6, 34.5)	37.72 (21.79, 54.94)
Prevalence	39882.3 (27535.5, 57452.6)	189341.7 (128908.6, 270540.5)	374.75 (316.77, 436.1)		510.3 (352.1, 726.8)	631.3 (433.6, 900.4)	23.72 (9.21, 39.75)
DALYs	341.7 (150.1, 727.6)	1640 (706.5, 3495.4)	379.97 (319.38, 450.6)		4.4 (1.9, 9.2)	5.4 (2.3, 11.6)	24.42 (9.6, 41.51)
Algeria
Incidence	9767.9 (6754.7, 13859.2)	17007.7 (11426.1, 24406.5)	74.12 (50.4, 100.75)		28.2 (19.7, 39.9)	41 (27.7, 58.8)	45.21 (26.39, 65.94)
Prevalence	178872.5 (123425.4, 257407.5)	500093 (338802.2, 717341.1)	179.58 (143.51, 216.07)		744.2 (516, 1063.4)	1092 (741.3, 1569.7)	46.73 (26.98, 65.15)
DALYs	1603.6 (677.5, 3188.7)	4389 (1907.4, 9207.8)	173.69 (138.2, 212.54)		6.6 (2.8, 13.2)	9.6 (4.2, 20.2)	45.25 (26.53, 65.23)
Bahrain
Incidence	191.1 (130.6, 271.7)	499.9 (350.4, 703.7)	161.67 (130.4, 196.04)		39.4 (26.9, 56.2)	41.8 (28.8, 59.5)	5.98 (-8.57, 20.02)
Prevalence	4935.1 (3335.2, 7031.1)	15710.1 (10800.9, 22287.7)	218.33 (182.73, 256.41)		823.7 (555.4, 1172.5)	833.7 (575.5, 1183.4)	1.21 (-10.52, 13.68)
DALYs	43.9 (18.7, 92)	138.1 (60.7, 291.9)	214.56 (178.38, 255.16)		7.3 (3.1, 15.2)	7.4 (3.3, 15.4)	0.84 (-10.57, 14.44)
Egypt
Incidence	23410 (16078.3, 33615.5)	50587 (35062.6, 71900)	116.09 (89.22, 146.73)		33.2 (22.8, 47.5)	42 (29.4, 59.8)	26.59 (10.78, 44.49)
Prevalence	484925.5 (330314.8, 692705.1)	1213934.7 (839684.1, 1721360.8)	150.33 (119.07, 185.9)		890.7 (606.2, 1269.3)	1120.1 (776.5, 1585)	25.76 (10.47, 43.95)
DALYs	4459.7 (1964.5, 9373.2)	10871 (4840.8, 22507.3)	143.76 (114.22, 177.06)		8.1 (3.6, 17.1)	10 (4.5, 20.8)	23.09 (8.45, 39.86)
Iran (Islamic Republic of)
Incidence	23844.9 (16359.3, 33853)	29890.3 (21006.6, 42244.6)	25.35 (18.97, 30.93)		31.3 (21.8, 44)	41.4 (29.1, 58.8)	32.44 (25.98, 37.98)
Prevalence	430388.7 (297478.7, 609292.1)	1038574.2 (724084.7, 1468509.9)	141.31 (129.23, 151.53)		827.6 (573.7, 1165.3)	1087.3 (756.9, 1540.2)	31.38 (24.95, 37.25)
DALYs	3988.2 (1762.7, 8421)	9440.5 (4205, 19825.6)	136.71 (123.83, 147.95)		7.6 (3.4, 16)	10 (4.4, 21)	31.15 (24.05, 37.17)
Iraq
Incidence	8221.8 (5656, 11904.6)	18837.4 (12928.4, 26888.6)	129.12 (97.96, 159.12)		32.5 (22.6, 46.8)	37.5 (25.8, 53.6)	15.42 (-0.02, 30.42)
Prevalence	146410.5 (101563.8, 211860.3)	433287.9 (292930.5, 614282.5)	195.94 (156.7, 235.98)		847.8 (588.8, 1225.1)	966.2 (654.2, 1370.2)	13.97 (-1.03, 29.33)
DALYs	1304.1 (565.2, 2710.1)	3819.8 (1685.9, 7892)	192.91 (151.36, 235.63)		7.5 (3.2, 15.6)	8.5 (3.8, 17.5)	13.5 (-2.33, 28.79)
Jordan
Incidence	1638.3 (1134, 2323.4)	5754.5 (3975.2, 8166.8)	251.24 (202.7, 295.02)		30.1 (20.9, 42.6)	38.3 (26.4, 54.2)	27.21 (9.24, 43.3)
Prevalence	27981.4 (19303.3, 39938)	130388.9 (91058.4, 184647.3)	365.98 (300.84, 422.24)		772.9 (535.8, 1100.9)	941.4 (658.2, 1331.2)	21.8 (4.94, 36.81)
DALYs	254.7 (110.5, 530.9)	1156 (501.1, 2448.4)	353.93 (286.74, 414)		6.9 (3, 14.4)	8.3 (3.6, 17.6)	19.95 (2.69, 36.1)
Kuwait
Incidence	734.1 (506.3, 1049.4)	1591.1 (1106.1, 2267.1)	116.73 (91.57, 149.25)		42.6 (29.4, 61.3)	50.1 (34.7, 71.6)	17.58 (3.85, 34.69)
Prevalence	18885.5 (12925.1, 26994.7)	78719.9 (54159.3, 111727.2)	316.83 (267.57, 371.69)		917 (629, 1306.9)	1305.1 (898.4, 1851.6)	42.32 (25.65, 62.71)
DALYs	168.2 (73.8, 356)	688.1 (302.5, 1416)	309.2 (255.67, 367.97)		8.1 (3.6, 17.2)	11.5 (5.1, 23.8)	41.58 (23.43, 62.31)
Lebanon
Incidence	1131.5 (789.7, 1616)	1996.5 (1381.9, 2842.7)	76.44 (55.25, 106.08)		32.4 (22.7, 46.2)	41.8 (29, 59.6)	29.04 (13.76, 50.24)
Prevalence	26915.4 (18542.5, 38862.3)	69485.1 (48252.3, 99847.9)	158.16 (129.5, 201.81)		926 (636.7, 1335.2)	1145.4 (794.5, 1647.1)	23.7 (8.54, 44.63)
DALYs	236.1 (103.1, 481.4)	603.4 (260.9, 1242.8)	155.59 (126.77, 196.08)		8.1 (3.5, 16.5)	10 (4.3, 20.6)	23.23 (8.83, 44.53)
Libya
Incidence	2363.2 (1606.1, 3392.1)	2778.8 (1920.6, 3948)	17.59 (2.61, 35.96)		38.3 (26.2, 54.8)	41.3 (28.3, 59.5)	8.05 (-4.38, 25.54)
Prevalence	37550 (25424.4, 54373.3)	88291.3 (61276.5, 126378.5)	135.13 (107.73, 173.9)		907.7 (615.8, 1304.4)	1072.7 (741.8, 1537.4)	18.18 (4.35, 37.68)
DALYs	336.1 (149.2, 684.2)	778.2 (337.7, 1588.4)	131.52 (104.33, 171.35)		8.1 (3.5, 16.4)	9.5 (4.1, 19.4)	17.72 (4.87, 37.04)
Morocco
Incidence	9628.3 (6579.7, 13631.7)	13921 (9757.6, 20090.6)	44.58 (22.5, 66.4)		29.5 (20.3, 41.6)	37.8 (26.4, 54.5)	28.22 (8.78, 47.42)
Prevalence	194774.2 (132132, 277193.5)	396061.1 (272630.4, 566961)	103.34 (74.68, 131.5)		772.1 (525.7, 1099.3)	1011.5 (696.4, 1447.6)	31.01 (12.54, 48.32)
DALYs	1776.9 (784.8, 3668.7)	3516.5 (1567.1, 7249.7)	97.91 (68.92, 125.27)		7 (3.1, 14.5)	9 (4, 18.5)	28.69 (10.68, 46.75)
Palestine
Incidence	794.7 (538, 1141)	2401.7 (1650.3, 3363.9)	202.2 (162.81, 242.03)		28.5 (19.5, 40.6)	36.1 (24.9, 50.6)	26.58 (9.86, 42.93)
Prevalence	13832.6 (9291.3, 20030.6)	51397.1 (35008.7, 72817.8)	271.56 (225.07, 323.31)		772.2 (520, 1129.2)	953.3 (651.3, 1345.2)	23.46 (8.49, 40.09)
DALYs	123.4 (52.1, 256.7)	455.6 (205.9, 966.3)	269.12 (222.48, 320.86)		6.8 (2.9, 14.2)	8.4 (3.8, 17.7)	23.23 (7.06, 40.15)
Oman
Incidence	588.3 (387.1, 852)	1642.3 (1122.4, 2355.8)	179.16 (145.16, 226.9)		25.8 (17.4, 37)	44.7 (30.6, 63.4)	72.91 (52.17, 100.87)
Prevalence	10158 (6798.3, 14750.2)	49269.6 (33720.9, 70294.3)	385.03 (327.42, 467.8)		504.4 (338.4, 732.3)	874.4 (598.8, 1244.7)	73.34 (51.78, 102.73)
DALYs	90.1 (39, 188.5)	432.4 (187.8, 898.9)	380.09 (313.94, 462.56)		4.5 (1.9, 9.3)	7.7 (3.4, 16)	73.11 (50.52, 103.36)
Qatar
Incidence	142.9 (98, 204.3)	720.8 (491.2, 1046.6)	404.31 (343.97, 475.14)		38.9 (26.7, 56.1)	48.8 (33.1, 70.9)	25.27 (9.14, 42.07)
Prevalence	3601.2 (2478.1, 5241.3)	29513.7 (20102.3, 42804.1)	719.56 (617.97, 831)		652.9 (448.4, 951.6)	763.2 (519.7, 1111.1)	16.9 (2.83, 32.91)
DALYs	31.8 (13.7, 65.4)	258.2 (111.7, 529.7)	711.58 (608.38, 827.96)		5.8 (2.5, 11.9)	6.7 (3, 13.9)	16.69 (1.95, 33.71)
Saudi Arabia
Incidence	6789.6 (4606, 9699)	13424.2 (9203.3, 18972.8)	97.72 (69.86, 125.55)		33.2 (22.6, 47.2)	45.2 (30.7, 64.8)	36.19 (15.96, 54.25)
Prevalence	122934 (83811.3, 175194.4)	527576.3 (362950.6, 757709.6)	329.15 (265.79, 393.63)		742.8 (509, 1059.7)	1066.3 (733.9, 1545.5)	43.56 (23.05, 64.49)
DALYs	1092.2 (476.7, 2243.9)	4625.8 (2084.8, 9737.7)	323.52 (259.89, 390.37)		6.6 (2.9, 13.6)	9.4 (4.2, 19.7)	43.32 (21.8, 66.24)
Sudan
Incidence	5103 (3472.9, 7220.8)	19399.2 (13434.2, 27299.2)	280.15 (234.98, 336.68)		19.3 (13.3, 27)	33.3 (23.2, 46.6)	72.71 (52.83, 97.9)
Prevalence	96724 (64839.5, 137634.4)	415561.9 (287134.8, 592393.3)	329.64 (279.61, 391.92)		524.3 (353.7, 743.1)	921.2 (640, 1315.4)	75.69 (55.49, 100.39)
DALYs	851.3 (375.5, 1851.5)	3598.1 (1621.6, 7495.7)	322.65 (262.92, 389.87)		4.6 (2, 9.9)	7.9 (3.6, 16.6)	73.65 (50.56, 100.91)
Syrian Arab Republic
Incidence	5222.7 (3499.7, 7411.3)	7310.1 (5119.5, 10484.2)	39.97 (21.73, 59.97)		28.7 (19.4, 40.5)	38.7 (27, 55.2)	34.51 (17.42, 51.4)
Prevalence	86195.6 (57801.8, 123696.6)	158407.9 (109681.4, 226455.5)	83.78 (60.32, 107.83)		750.6 (506.1, 1064.3)	1146.7 (793.8, 1634.2)	52.77 (34.46, 73.18)
DALYs	764.6 (342.6, 1590.9)	1383.2 (613.7, 2874.1)	80.9 (56.63, 106.65)		6.6 (2.9, 13.7)	10 (4.4, 21)	52.29 (31.96, 73.85)
Tunisia
Incidence	2962.4 (2010.8, 4348.6)	3844.4 (2668.3, 5457.3)	29.77 (12.2, 46.37)		27.6 (18.9, 40.3)	38.2 (26.5, 54.2)	38.3 (20.31, 55.2)
Prevalence	61406.5 (41337.7, 90763.3)	128415.1 (88919.5, 181871.6)	109.12 (77.49, 138.7)		738.1 (497.2, 1088.4)	1053.4 (729.1, 1495.3)	42.71 (21.97, 61.9)
DALYs	562.8 (241.2, 1174.2)	1133.1 (504.1, 2370.7)	101.34 (70.9, 130.85)		6.7 (2.9, 14)	9.3 (4.2, 19.6)	39.23 (18.49, 58.81)
Republic of Turkey
Incidence	19470.6(13467.4,27768.8)	26768.3(18464.8,37876.4)	37.48 (22.19, 56.02)		26.1(18.2,37.2)	36.4(25.1,51.7)	39.29 (24.33, 58.39)
Prevalence	403512.2(275840.8,580270.8)	849004.6(583999.9,1212199.1)	110.4 (85.34, 138.55)		684.9(469.3,988.5)	962(660.4,1375.6)	40.46 (24.15, 58.49)
DALYs	3707.6(1656.9,7689.9)	7466.5(3325.6,15703.1)	101.39 (75.6, 126.77)		6.3(2.8,13)	8.5(3.8,17.9)	35.73 (18.6, 53.2)
United Arab Emirates
Incidence	515 (353.9, 739.1)	2034.3 (1397, 2922.5)	295 (234.21, 343.01)		33.1 (22.7, 47.3)	44.8 (30.5, 64.4)	35.46 (14.23, 52.43)
Prevalence	12848.4 (8784.5, 18398.3)	83029.7 (57477.3, 119902.7)	546.23 (446.02, 625.06)		567 (388.7, 812.7)	818.2 (560.3, 1189.2)	44.31 (22.52, 61.13)
DALYs	113.8 (50.1, 237.5)	716.7 (312.6, 1500.6)	529.64 (435.4, 607.62)		5 (2.2, 10.5)	7.3 (3.2, 15.1)	44.74 (22.37, 64.32)
Yemen
Incidence	3508.3 (2428, 5094.6)	11282.5 (7615.3, 16305.2)	221.6 (168.4, 265.63)		19.3 (13.6, 27.7)	24.4 (16.5, 34.9)	26.09 (7.03, 42.07)
Prevalence	59220.2 (40799.2, 87106.5)	221143.2 (147973.1, 322243.7)	273.43 (213.91, 325.31)		530.1 (370.2, 781.2)	652.2 (438.3, 944.8)	23.03 (3.97, 39.17)
DALYs	523.5 (231.3, 1119.3)	1951 (844.5, 4188.4)	272.71 (212.74, 325.34)		4.7 (2.1, 9.9)	5.7 (2.5, 12.3)	22.97 (3.47, 40.37)
South Asia
Incidence	162363.3 (116293.1, 226382.7)	416258.4 (299377.4, 573874.2)	156.37 (142.93, 175.38)		12.2 (8.8, 16.8)	20.3 (14.4, 28.1)	66.1 (56.5, 77.13)
Prevalence	3294301.2 (2344772, 4593824.8)	11291117.1 (7950085.9, 15832639.8)	242.75 (222.38, 269.54)		309.1 (222.4, 429.6)	557.8 (392.8, 781)	80.44 (69.61, 94.73)
DALYs	29342.1 (12824.1, 62333.8)	98946.9 (43231.5, 207059.2)	237.22 (215.88, 262.7)		2.7 (1.2, 5.8)	4.9 (2.1, 10.2)	78.54 (67.27, 91.55)
Bangladesh
Incidence	10380.8 (7096.9, 14814.3)	22460.1 (15709.1, 31143.1)	116.36 (92.43, 146.56)		7.5 (5.2, 10.6)	12.4 (8.7, 17.2)	65.16 (48.46, 88.1)
Prevalence	182343.3 (123657.9, 263159.2)	569396.9 (391140, 811981.3)	212.27 (176.74, 260.2)		180.3 (122.9, 258.4)	320.8 (220.6, 457.2)	77.92 (58.57, 105.32)
DALYs	1643.2 (699.2, 3424.9)	5038.2 (2153.4, 10681.5)	206.61 (162.31, 266.05)		1.6 (0.7, 3.4)	2.8 (1.2, 6)	76.46 (52.79, 109.4)
Bhutan
Incidence	87.6 (60.3, 122.8)	142.6 (99.1, 202.4)	62.83 (43.82, 83.38)		9.7 (6.8, 13.6)	18.3 (12.7, 26.2)	88.07 (65.98, 111.34)
Prevalence	1535.7 (1054, 2213.9)	3965.3 (2711.7, 5692.4)	158.21 (129.28, 193.09)		247.5 (171, 353.6)	450.7 (308.8, 646.8)	82.11 (59.49, 105.78)
DALYs	13.7 (5.9, 28.8)	35.1 (15.4, 73.8)	156.89 (121.59, 199.96)		2.2 (0.9, 4.6)	4 (1.7, 8.4)	82.43 (56.72, 113.87)
India
Incidence	132304.5 (95396.6, 183976.1)	346723.5 (248263.8, 476794.3)	162.06 (146.91, 182.52)		12.9 (9.4, 17.8)	22.4 (15.9, 31)	73.77 (62.5, 85.92)
Prevalence	2763585.1 (1975943.2, 3834373.3)	9664220.1 (6823030.5, 13535722.5)	249.7 (227.93, 278.58)		325.9 (234.6, 450.4)	616.4 (435.4, 862.9)	89.15 (77.06, 105.11)
DALYs	24574.9 (10826.5, 52063.6)	84358.4 (37037.1, 176822.9)	243.27 (220.99, 270.56)		2.9 (1.3, 6.1)	5.4 (2.4, 11.3)	86.66 (74.7, 101.94)
Nepal
Incidence	1829.9 (1293.3, 2604.6)	4855 (3368.1, 6762)	165.32 (138.95, 203.08)		7.7 (5.5, 10.8)	13.3 (9.2, 18.5)	71.43 (51.38, 93.85)
Prevalence	35259.6 (24358.6, 51097.8)	119833.2 (82473.8, 171688.6)	239.86 (200.2, 286.74)		196.6 (136, 281.6)	358.2 (246.1, 511.1)	82.2 (62.05, 107.63)
DALYs	312.4 (132.5, 676.9)	1076 (455.1, 2227.4)	244.45 (193.96, 308.3)		1.7 (0.7, 3.7)	3.2 (1.4, 6.6)	84.49 (58.11, 116.73)
Pakistan
Incidence	17760.5 (12559.8, 25241.8)	42077.2 (29621.9, 59560.9)	136.91 (121.75, 155.33)		12.4 (9, 17.4)	14.6 (10.3, 20.6)	17.6 (11.25, 25.62)
Prevalence	311577.5 (218506.9, 452222.7)	933701.6 (636727.6, 1334539.1)	199.67 (180.9, 222.99)		314.7 (222.4, 452.9)	380.9 (262.1, 543)	21.04 (13.85, 30.19)
DALYs	2797.9 (1190.4, 5992.9)	8439.2 (3618.3, 18337.4)	201.63 (178.28, 228.06)		2.8 (1.2, 6)	3.4 (1.5, 7.4)	22.49 (13.47, 33.13)
Southern Sub-Saharan Africa
Incidence	11799.7 (8261, 16787.8)	18377.8 (12888.4, 26038)	55.75 (48.83, 64.41)		17.2 (12.1, 24.3)	21 (14.7, 29.8)	22.06 (16.26, 27.85)
Prevalence	232808.6 (160575, 334631.4)	480389.6 (328945.2, 679589.3)	106.35 (96.18, 116.82)		449.2 (310.3, 643.1)	551.2 (377.3, 779.2)	22.7 (17.12, 29.22)
DALYs	2047.4 (881.8, 4435.2)	4157.7 (1795.1, 8746)	103.07 (92.15, 114.77)		3.9 (1.7, 8.5)	4.8 (2.1, 10)	21.67 (15.51, 28.58)
Botswana
Incidence	262.1 (180.9, 378.8)	544.5 (372.2, 764.3)	107.73 (76.96, 132.81)		14.2 (10, 20.3)	20.9 (14.2, 29.5)	47.84 (27.67, 66.32)
Prevalence	4466.9 (3063.2, 6410.5)	14821.7 (10044.3, 20992.5)	231.81 (181.34, 275.54)		367.9 (252.2, 526.6)	541.4 (367.1, 766.3)	47.14 (25.73, 67.06)
DALYs	38.4 (16.5, 82.4)	126.4 (55, 265)	229.13 (179.82, 274.47)		3.1 (1.3, 6.8)	4.6 (2, 9.7)	46.98 (26.79, 68.59)
Lesotho
Incidence	257.3 (180.2, 371.8)	438.5 (301.4, 629.2)	70.38 (48.4, 93.13)		12.9 (9, 18.3)	18.1 (12.5, 26.1)	40.11 (23.76, 61.41)
Prevalence	4800.9 (3314.1, 6946.8)	9573.5 (6489.3, 13849.8)	99.41 (74.16, 128.24)		359 (249.1, 515.7)	472.7 (320.7, 684.8)	31.68 (15.38, 51.01)
DALYs	42.1 (18.3, 89.4)	83.3 (36.2, 184.2)	97.81 (70.36, 128.96)		3.1 (1.4, 6.6)	4.1 (1.8, 9)	30.51 (12.99, 51.54)
Namibia
Incidence	254.3 (177.5, 359.6)	522.1 (365.1, 748.6)	105.35 (82.9, 126.43)		13.3 (9.4, 18.7)	17.6 (12.3, 25.1)	32.15 (17.97, 45.16)
Prevalence	4499.6 (3139.6, 6348.2)	11832.8 (8097.1, 16973.7)	162.97 (133.04, 191.38)		340.2 (235.1, 478.1)	454.4 (313.1, 652.2)	33.58 (18.35, 48.25)
DALYs	39.4 (16.9, 85.6)	103.2 (45.7, 210.7)	162.23 (129.17, 204.12)		3 (1.2, 6.4)	3.9 (1.7, 8)	33.56 (17.51, 53.3)
South Africa
Incidence	8562.1 (5951.5, 12153.5)	13170.8 (9223.7, 18578.6)	53.83 (45.72, 61.99)		18.3 (12.8, 25.8)	23 (16.1, 32.6)	26.07 (19.18, 32.35)
Prevalence	178383.1 (123305.3, 255209.8)	369432.2 (252296.5, 524097)	107.1 (94.9, 118.46)		470.1 (325.8, 670.3)	586.7 (399.9, 831.4)	24.8 (17.72, 31.74)
DALYs	1573.3 (675.2, 3402.2)	3198.1 (1370.1, 6653.6)	103.28 (90.75, 115.23)		4.1 (1.8, 8.9)	5.1 (2.2, 10.6)	23.63 (15.91, 30.91)
Eswatini
Incidence	209.9 (142.8, 301.1)	315.5 (217.5, 444.3)	50.32 (29.89, 70.95)		18.3 (12.7, 26.2)	21.4 (14.8, 30.1)	16.88 (1.4, 30.45)
Prevalence	3580.4 (2440.5, 5138.7)	7165.2 (4897.3, 10138.7)	100.13 (72.15, 125.89)		496.4 (339.9, 718.9)	574.6 (393, 818)	15.75 (-0.8, 29.84)
DALYs	31.7 (13.4, 65.4)	62.7 (26.4, 127.5)	97.53 (72.65, 124)		4.4 (1.8, 9)	5 (2.1, 10.1)	14.61 (-0.34, 29.26)
Zimbabwe
Incidence	2254 (1513.9, 3252.8)	3386.5 (2358.1, 4811.4)	50.24 (33.03, 67.48)		15.2 (10.4, 21.7)	16.3 (11.5, 23.1)	7.39 (-4.92, 19.1)
Prevalence	37077.7 (24697.5, 53346.3)	67564.2 (46296.8, 96606.9)	82.22 (60.67, 105.55)		398 (267.3, 572.6)	432.4 (296.3, 619.2)	8.66 (-4.27, 22.18)
DALYs	322.5 (141.7, 685.9)	584 (249.2, 1237)	81.07 (58.67, 110.28)		3.4 (1.5, 7.2)	3.7 (1.6, 7.9)	8.41 (-3.68, 24.7)
Western Sub-Saharan Africa
Incidence	24710.3 (17219.7, 35159.5)	92826.2 (65226.5, 132560.9)	275.66 (259.12, 296.05)		10.3 (7.4, 14.4)	14.2 (10.1, 20)	37.15 (30.95, 44.42)
Prevalence	438598.3 (307139.7, 633877.8)	1741945.4 (1209889.2, 2493010.7)	297.16 (279.57, 319.43)		252.3 (177.7, 360.9)	378 (265.9, 537)	49.81 (43, 58.43)
DALYs	3816.2 (1629, 8015.4)	15176.8 (6521.5, 32235.9)	297.69 (279.03, 324.49)		2.2 (0.9, 4.6)	3.3 (1.4, 6.9)	50.04 (42.93, 60.11)
Benin
Incidence	534.2 (372.3, 761.8)	2958.4 (1989.2, 4268.4)	453.77 (387.32, 536.66)		9.3 (6.5, 12.9)	16.6 (11.4, 23.7)	79.3 (58.03, 105.41)
Prevalence	10129.2 (6982.1, 14714.3)	55218.5 (37120.6, 79494.7)	445.14 (382.5, 532.43)		250.2 (173, 358)	436.7 (296.1, 627.4)	74.51 (54.36, 101.8)
DALYs	87.1 (37.4, 186.4)	476.5 (205.5, 1010.6)	446.79 (374.41, 545.42)		2.1 (0.9, 4.5)	3.7 (1.6, 7.9)	74.89 (52.09, 105.97)
Burkina Faso
Incidence	1048.2 (729.3, 1523.8)	4149.6 (2845.6, 5825)	295.86 (249.67, 350.06)		8.8 (6.2, 12.4)	13.9 (9.8, 19.5)	57.72 (39.1, 77.31)
Prevalence	18272.4 (12443.6, 26469.3)	76846.3 (52612.4, 110149.8)	320.56 (269.8, 378.14)		237.4 (163.1, 342.6)	367.7 (252.3, 526.6)	54.88 (36.17, 76.33)
DALYs	162.5 (68.6, 352.8)	669.3 (283.4, 1426.4)	311.91 (251.01, 389.92)		2.1 (0.9, 4.5)	3.2 (1.3, 6.7)	52.39 (31.07, 80.3)
Cameroon
Incidence	1771.4 (1188.7, 2518.3)	7518 (4966.6, 10838.8)	324.42 (269.73, 373.39)		13.5 (9.3, 19.3)	17.6 (11.8, 25.3)	30.78 (14.55, 46.05)
Prevalence	33138.8 (22238.7, 47933.4)	146559.6 (97348.7, 216294.1)	342.26 (285.78, 394.11)		360 (243.5, 519)	468.1 (311.3, 690.6)	30.03 (13.94, 44.91)
DALYs	290.8 (122.6, 622.1)	1295 (554.1, 2721)	345.24 (285.38, 411.45)		3.1 (1.3, 6.7)	4.1 (1.8, 8.7)	31.02 (13.87, 50.13)
Cabo Verde
Incidence	44.8 (31, 64.1)	94 (65.8, 133.5)	109.65 (84.25, 138.01)		10 (7.1, 14)	16 (11.1, 22.7)	61.12 (41.73, 85.37)
Prevalence	800 (547.6, 1161.9)	2540.8 (1745.7, 3680.8)	217.59 (177.94, 266.33)		277.7 (194.4, 398.4)	401.4 (275.6, 580.1)	44.52 (27.22, 67.05)
DALYs	7 (3, 14.9)	21.9 (9.5, 46)	213.3 (167.66, 263.4)		2.4 (1, 5)	3.5 (1.5, 7.2)	44.35 (24.87, 68.75)
Chad
Incidence	514 (352.2, 733.9)	2462.8 (1683.7, 3519.6)	379.15 (325.07, 438.96)		7.1 (5, 10)	10.3 (7.3, 14.5)	45.84 (30.7, 63.39)
Prevalence	9037.9 (6054.6, 13099.9)	40291.3 (27734, 58317)	345.8 (295.77, 399.41)		182.4 (125.4, 261.7)	270.4 (186.3, 389.8)	48.23 (32, 65.82)
DALYs	77.3 (33.1, 162.4)	346.9 (148.3, 742.5)	348.8 (284.92, 419.56)		1.5 (0.7, 3.2)	2.3 (1, 4.9)	48.82 (28.11, 72.47)
CÂ'te d'Ivoire
Incidence	1394.6 (952.3, 2030.2)	5019.4 (3426.2, 7345.2)	259.93 (222.05, 315.1)		9.2 (6.4, 13.2)	14.4 (9.9, 20.8)	55.63 (39.58, 79.25)
Prevalence	25688.9 (17478, 37918.2)	103693 (71072.5, 152858.8)	303.65 (260.61, 363.81)		226.7 (155, 331.6)	372.8 (256, 548.3)	64.43 (46.9, 88.82)
DALYs	222.6 (93.2, 484.6)	898.4 (391.6, 1901.5)	303.53 (249.35, 380.69)		1.9 (0.8, 4.2)	3.2 (1.4, 6.8)	65.06 (43.9, 96.04)
Gambia
Incidence	118 (82.1, 165.9)	455.4 (318.1, 649.1)	286 (242.38, 335.19)		9.5 (6.6, 13.1)	13.9 (9.7, 19.7)	46.77 (30.73, 65.83)
Prevalence	2142.7 (1469.8, 3054.9)	8704 (5983.6, 12694.2)	306.22 (260.17, 358.34)		237 (164.2, 338.9)	363.4 (251.4, 525.9)	53.35 (36.63, 72.81)
DALYs	18.7 (7.8, 39.6)	75.7 (32.1, 151.6)	305.52 (252.02, 375.19)		2 (0.9, 4.3)	3.1 (1.3, 6.3)	53.08 (33.64, 78.28)
Ghana
Incidence	1812.1 (1256, 2564.7)	5895 (4176.2, 8487.4)	225.32 (183.38, 259.61)		9.6 (6.8, 13.4)	14.1 (10.1, 20.2)	46.68 (28.3, 61.9)
Prevalence	34521.3 (23735.7, 50173.4)	134389.2 (92881.9, 196019.5)	289.29 (243.51, 336.35)		250.4 (173.7, 360.9)	380.5 (264, 552.4)	51.98 (33.41, 70.31)
DALYs	298.6 (128.5, 642.3)	1159.9 (499.2, 2360.8)	288.41 (233.64, 350.17)		2.2 (0.9, 4.6)	3.3 (1.4, 6.7)	52.02 (30.83, 75.07)
Guinea
Incidence	579.6 (400.9, 806)	2274.5 (1585.7, 3258.1)	292.44 (247.88, 337.31)		8.6 (6, 11.8)	12.9 (9, 18.2)	49.53 (32.91, 65.7)
Prevalence	11676.2 (8001.1, 16711.6)	43311.2 (29735.9, 62037)	270.94 (226.31, 313.51)		230 (159, 327.1)	350.1 (242.7, 501.8)	52.21 (34.52, 68.92)
DALYs	100.2 (42.6, 205.6)	373.5 (160.9, 810.4)	272.9 (221.29, 332.48)		2 (0.8, 4)	3 (1.3, 6.5)	52.79 (32.49, 75.57)
Guinea-Bissau
Incidence	112.9 (78.1, 163.9)	344.5 (238.2, 495.3)	204.97 (172.27, 241.34)		8.7 (6.1, 12.4)	12.6 (8.8, 17.8)	45.4 (30.93, 61.32)
Prevalence	1993.5 (1376.2, 2961.6)	6832.1 (4700.9, 9925.5)	242.71 (204, 282.39)		228.6 (159.1, 337.7)	339.9 (234, 489.5)	48.69 (32.34, 64.74)
DALYs	17.3 (7.3, 36.4)	59.3 (25.4, 123.6)	242.5 (195.2, 301.32)		2 (0.8, 4.1)	2.9 (1.3, 6.1)	49 (28.86, 73.44)
Liberia
Incidence	284.5 (198.2, 411)	1007.3 (700.8, 1458.1)	254.05 (213.02, 294.54)		9.7 (6.9, 13.8)	13.7 (9.6, 19.7)	41.22 (25.59, 56.89)
Prevalence	5431.7 (3691.5, 7987.9)	19961.5 (13688.2, 29350.6)	267.5 (225.05, 312.23)		246.5 (169.4, 359.3)	353.2 (242.9, 517.6)	43.32 (27.28, 60.61)
DALYs	47.1 (20, 101.8)	170 (73.5, 351.3)	261.13 (211.63, 320.38)		2.1 (0.9, 4.5)	3 (1.3, 6.2)	41.43 (22.88, 64.01)
Mali
Incidence	750.9 (524.3, 1076.6)	3708.5 (2532.4, 5318)	393.88 (340.57, 459.31)		7.4 (5.3, 10.4)	11.4 (7.9, 16.2)	54.51 (36.95, 73.95)
Prevalence	14001 (9586.3, 20176.6)	63797 (43036.6, 92385.7)	355.66 (304.73, 413.73)		192.3 (132.9, 275.2)	301.2 (204.9, 434.9)	56.6 (39.43, 75.38)
DALYs	123 (52.3, 269.3)	554.9 (241.8, 1183.2)	351.22 (291.38, 419.93)		1.7 (0.7, 3.6)	2.6 (1.1, 5.6)	54.89 (34.52, 77.15)
Mauritania
Incidence	305.2 (212.6, 448.3)	973.8 (674.4, 1397.4)	219.02 (178.02, 260.46)		11.9 (8.4, 17.1)	16.5 (11.5, 23.3)	39 (21.7, 56.95)
Prevalence	5662.8 (3858, 8437.1)	18290.5 (12523.8, 26298.9)	223 (183.38, 267.64)		307.4 (210.9, 455)	439.3 (301, 629.8)	42.9 (25.78, 62.92)
DALYs	49.9 (21.5, 107.7)	161 (69, 326.6)	222.55 (176.28, 276.75)		2.7 (1.2, 5.8)	3.8 (1.6, 7.8)	42.76 (22.91, 67.17)
Niger
Incidence	775.3 (541.3, 1085.1)	3547.1 (2473.2, 5103.8)	357.53 (304.81, 401.73)		7.9 (5.6, 10.9)	10.3 (7.3, 14.6)	30.62 (15.89, 42.1)
Prevalence	13284.4 (9134, 18886.2)	55429.6 (38278.3, 80304)	317.25 (266.6, 361.92)		196.7 (136.6, 277.4)	266.5 (184.5, 385.7)	35.48 (19.49, 49.48)
DALYs	117.8 (50, 246.3)	484.1 (199, 1012.4)	310.82 (250.95, 368.99)		1.7 (0.7, 3.6)	2.3 (1, 4.8)	33.52 (15.89, 51.25)
Nigeria
Incidence	12722.1 (8906.2, 18046.2)	46649.8 (32689.4, 66406.8)	266.68 (251.47, 285)		11.4 (8.2, 15.8)	14.8 (10.6, 20.8)	30.62 (25.33, 36.99)
Prevalence	217576.8 (152088.6, 318301.1)	848802.6 (590703.7, 1212326.1)	290.12 (272.41, 312.88)		260 (183.1, 374.8)	393.5 (276, 560.4)	51.33 (44.45, 59.73)
DALYs	1888.1 (808.9, 3929.1)	7410.2 (3180.2, 15722.6)	292.46 (271.71, 316.93)		2.2 (1, 4.7)	3.4 (1.5, 7.3)	52.06 (44.86, 61.31)
Sao Tome and Principe
Incidence	16.7 (11.5, 24.2)	42.9 (30.1, 61.9)	157.22 (127.26, 194.24)		10.1 (7.2, 14.4)	14.9 (10.5, 21.4)	47.41 (29.38, 65.07)
Prevalence	264.2 (182.6, 383.1)	856.2 (588.8, 1231.7)	224.04 (182.17, 267.3)		263.5 (183.3, 377)	375.2 (259.1, 537.5)	42.37 (25.65, 61.21)
DALYs	2.3 (1, 5)	7.4 (3.2, 15.3)	223.41 (176.09, 281.32)		2.3 (1, 4.9)	3.2 (1.4, 6.7)	42.87 (23.71, 67.09)
Senegal
Incidence	1096.8 (766.7, 1593.8)	2746 (1881.6, 3950.1)	150.37 (122.13, 175.07)		11.2 (8, 16.1)	13 (9, 18.6)	16.6 (3.45, 28.12)
Prevalence	19011.9 (13059.3, 27872.8)	54552.7 (37552.2, 78335.2)	186.94 (153.5, 215.53)		288.5 (201, 421)	351.7 (242, 506.3)	21.89 (7.58, 33.88)
DALYs	167.6 (70.6, 370.4)	478 (207.5, 1018.1)	185.14 (147.76, 225.87)		2.5 (1.1, 5.5)	3.1 (1.3, 6.6)	21.53 (6.64, 37.12)
Sierra Leone
Incidence	407.3 (282.5, 565)	1624.6 (1116.5, 2356.5)	298.85 (246.45, 360.27)		8.5 (5.9, 11.7)	14.1 (9.7, 20.3)	65.06 (43.76, 90.04)
Prevalence	8445.9 (5749.6, 12155.8)	32666.8 (22104.8, 48130.8)	286.78 (234.59, 346.78)		219.5 (150.5, 313.8)	363.2 (246.5, 533.3)	65.51 (43.39, 90.7)
DALYs	72.5 (31.9, 146.2)	280.6 (119.9, 600.1)	287.17 (225.55, 355.92)		1.9 (0.8, 3.8)	3.1 (1.3, 6.6)	65.49 (39.55, 93.36)
Togo
Incidence	420.9 (289.8, 603.7)	1353.6 (940.5, 1965.7)	221.59 (187.57, 262.8)		8.8 (6.2, 12.4)	12.8 (8.9, 18.3)	44.8 (29.59, 62.67)
Prevalence	7504.2 (5089.7, 10881.5)	29182.2 (19922, 42929.4)	288.88 (248.19, 340.79)		234.2 (160.8, 335.1)	349.6 (239.4, 512)	49.28 (33.9, 67.96)
DALYs	65.6 (27.6, 139.1)	254.1 (109, 540.8)	287.28 (234.35, 347.93)		2 (0.9, 4.4)	3 (1.3, 6.5)	49.34 (29.58, 70.49)
Eastern Sub-Saharan Africa
Incidence	25902 (18214, 36986.2)	76605.1 (53945.1, 108540.5)	195.75 (184.89, 208.9)		10.4 (7.5, 14.6)	13.1 (9.3, 18.4)	25.75 (20.85, 30.88)
Prevalence	448071 (310256.9, 646236.2)	1438942.4 (1001296.8, 2063339.5)	221.14 (209.9, 235.3)		266.9 (188.2, 383.1)	342.7 (242, 486.2)	28.38 (23.73, 34.2)
DALYs	3903.3 (1645.1, 8198.6)	12497.1 (5380.7, 26310.2)	220.17 (206.43, 236.52)		2.3 (1, 4.9)	3 (1.3, 6.2)	28.27 (22.86, 34.73)
Burundi
Incidence	595.3 (412.8, 845.6)	1664 (1145.4, 2344.1)	179.54 (151.98, 207.7)		8.9 (6.3, 12.5)	9.5 (6.6, 13.1)	7.02 (-2.43, 17.74)
Prevalence	11045.3 (7615.5, 15674.4)	28909.3 (19638.5, 41714.4)	161.73 (135.28, 190.21)		226.9 (157.3, 321.5)	228.8 (156, 330)	0.83 (-9.23, 11.14)
DALYs	96.7 (41.2, 206.5)	251.1 (104.8, 525.2)	159.67 (127.7, 199.41)		2 (0.8, 4.2)	2 (0.8, 4.1)	0.51 (-12.2, 15.08)
Comoros
Incidence	79.5 (54.4, 115.9)	129.4 (88.8, 183)	62.7 (39.91, 84.03)		12.6 (8.8, 18.1)	14.8 (10.2, 20.9)	16.98 (1.24, 30.62)
Prevalence	1382.1 (941, 2036.3)	3037.4 (2080.9, 4386.1)	119.78 (88.63, 148.07)		335.5 (230.2, 489.3)	384.5 (263.9, 554.2)	14.6 (-0.67, 28.54)
DALYs	12.4 (5.1, 26.4)	27.1 (11.7, 56.1)	119.17 (85.41, 149.87)		3 (1.2, 6.2)	3.4 (1.5, 7.1)	15.12 (-1.94, 31.4)
Djibouti
Incidence	55.4 (38.8, 80.1)	212.4 (144.1, 308.9)	283.38 (233.97, 346.47)		9.5 (6.7, 13.6)	15 (10.2, 21.9)	57.94 (36.77, 83.52)
Prevalence	1008.4 (692.4, 1513.7)	5669 (3824.6, 8246.9)	462.16 (386.62, 558.73)		242.3 (167.4, 359.5)	406.6 (274.6, 591.5)	67.85 (45.46, 95.72)
DALYs	8.8 (3.7, 18.5)	49.1 (21.5, 105)	458.74 (376.54, 555.68)		2.1 (0.9, 4.4)	3.5 (1.5, 7.5)	68.06 (43.06, 95.97)
Eritrea
Incidence	335.8 (233.4, 473.5)	902.6 (632.8, 1300.3)	168.79 (143.03, 198)		7.5 (5.3, 10.3)	10.9 (7.7, 15.6)	45.44 (31.9, 61.22)
Prevalence	6070 (4100.5, 8755.2)	19234.9 (13121.8, 28015.8)	216.89 (185.14, 252.34)		198.6 (135.6, 283)	280 (191.1, 405.5)	40.95 (27.11, 56.87)
DALYs	53.6 (23, 113.5)	168.7 (69.4, 357.2)	214.66 (173.55, 267.13)		1.7 (0.7, 3.7)	2.4 (1, 5.2)	40.69 (23.31, 63.3)
Ethiopia
Incidence	4981.1 (3496.6, 7049.9)	17269.8 (12201.1, 24551.2)	246.7 (217.7, 275.13)		8 (5.8, 11.1)	11.6 (8.2, 16.2)	44.51 (33.02, 58.41)
Prevalence	87464.3 (60183.4, 124497.4)	328062.5 (230109.4, 477938.9)	275.08 (243.41, 309.73)		202.6 (141.8, 287.8)	300.6 (213.2, 434.4)	48.33 (36.17, 62.08)
DALYs	765.7 (320.6, 1602.1)	2879.3 (1231.8, 6264.1)	276 (238.92, 314.6)		1.8 (0.7, 3.6)	2.6 (1.1, 5.7)	48.54 (35.01, 63.92)
Kenya
Incidence	3835.3 (2687.6, 5492.6)	9930.3 (7000.1, 14105.3)	158.92 (149.84, 171.03)		12.1 (8.7, 16.9)	14.4 (10.3, 20.1)	18.21 (14.25, 23.46)
Prevalence	61876.2 (43254.1, 89147.1)	197985.6 (137954.9, 284628.1)	219.97 (207.63, 235.13)		304.5 (215.4, 434.7)	378.1 (266.1, 540.8)	24.18 (19.59, 30.69)
DALYs	542.5 (231.3, 1152.8)	1716.7 (732.1, 3614.9)	216.47 (203, 233.42)		2.6 (1.1, 5.6)	3.3 (1.4, 6.9)	23.36 (18.18, 29.9)
Madagascar
Incidence	1479.9 (1022.2, 2138)	4264.4 (2937.1, 6112.6)	188.16 (155.2, 233.46)		9.6 (6.8, 13.5)	11.1 (7.7, 15.7)	15.29 (2.94, 31.72)
Prevalence	26033.1 (17734.5, 38033.5)	80942.7 (55276.3, 118989.2)	210.92 (173.85, 261.99)		243.9 (168.4, 351.9)	285 (195.5, 415.8)	16.84 (3.01, 35.13)
DALYs	229.4 (98.3, 495.7)	718.3 (308.7, 1468.9)	213.14 (171.25, 270.11)		2.1 (0.9, 4.6)	2.5 (1.1, 5.1)	17.6 (2.7, 38.38)
Malawi
Incidence	1610.9 (1101.7, 2332.1)	4248.7 (2984.6, 6103.4)	163.75 (132.79, 193.22)		12.8 (8.9, 18.3)	14.6 (10.3, 20.8)	14.21 (1.12, 26.62)
Prevalence	29503.2 (19928.8, 43308.4)	72724.2 (49813.2, 105705.5)	146.5 (118.66, 175.18)		331.2 (226.2, 480.8)	372.8 (257.6, 538.5)	12.57 (0.04, 24.67)
DALYs	254.5 (107.2, 549.3)	625.7 (276.6, 1277)	145.88 (112.48, 181.76)		2.8 (1.2, 6.1)	3.2 (1.4, 6.6)	12.67 (-2.08, 28.04)
Mozambique
Incidence	1650.5 (1123.2, 2362.6)	6138.3 (4201.2, 8777.8)	271.91 (231.45, 320.53)		9.7 (6.8, 13.6)	14.3 (9.8, 20.2)	46.23 (30.66, 63.66)
Prevalence	29855.9 (20301.9, 44278.8)	109182.4 (73741.9, 159482.8)	265.7 (224.88, 314.32)		256.2 (175, 373.2)	378.8 (257.3, 549.6)	47.85 (31.92, 66.71)
DALYs	258 (108.6, 501.5)	939.5 (395.4, 1916.6)	264.19 (216.25, 318.6)		2.2 (0.9, 4.3)	3.2 (1.4, 6.6)	46.87 (27.77, 67.96)
Rwanda
Incidence	1075 (745.1, 1560.9)	2483.3 (1708.6, 3612.2)	131 (99.78, 161.45)		11.7 (8.2, 16.6)	14.4 (10, 20.7)	23.24 (7.41, 38.07)
Prevalence	18636.5 (12780.8, 27278.9)	51083.5 (34967.2, 73761.7)	174.1 (136.79, 208.23)		293.9 (202.7, 423.9)	371.5 (255.3, 536.1)	26.39 (10.05, 42.06)
DALYs	164 (70.2, 347.5)	443.7 (189.8, 950)	170.45 (132.23, 214.9)		2.6 (1.1, 5.4)	3.2 (1.4, 6.8)	25.36 (8.43, 44.77)
Somalia
Incidence	922 (634.3, 1342.8)	3077.5 (2136, 4496.5)	233.77 (194.82, 270.92)		8.7 (6.1, 12.2)	10.5 (7.4, 15.1)	20.21 (7.49, 33.6)
Prevalence	16321.9 (11179.5, 23593.5)	54013 (37137.1, 80152.3)	230.92 (192.33, 271.29)		233.2 (161.2, 333)	272.2 (186.5, 401.6)	16.72 (3.94, 30.61)
DALYs	141.1 (60, 296.8)	470.9 (198, 999.3)	233.59 (187.71, 277.22)		2 (0.9, 4.2)	2.4 (1, 5)	17.34 (1.81, 32.1)
South Sudan
Incidence	786.2 (546.7, 1124.1)	1564.3 (1066.9, 2272.7)	98.96 (78.92, 124.04)		9.9 (7, 14)	11.1 (7.8, 15.9)	12.34 (1.63, 26.27)
Prevalence	13732.6 (9381, 20065.2)	27377.4 (18722.1, 39864.1)	99.36 (79.35, 124.49)		252.4 (174, 363.5)	309.9 (212, 446.8)	22.78 (10.53, 37.64)
DALYs	120.2 (49.3, 265.5)	238.9 (103.2, 512.2)	98.67 (72.3, 129.7)		2.2 (0.9, 4.8)	2.7 (1.2, 5.7)	22.76 (7.27, 41.21)
United Republic of Tanzania
Incidence	4372 (2969.7, 6294.9)	11879.4 (8174, 16805.8)	171.71 (143.88, 204.51)		12.6 (8.7, 17.9)	15.2 (10.6, 21.3)	20.61 (8.54, 34.64)
Prevalence	76072.1 (51219.8, 111575.3)	229887 (157473.7, 328170.7)	202.2 (171.7, 242.77)		332.9 (225.6, 486.7)	403.8 (276.5, 575.6)	21.29 (9.19, 37.14)
DALYs	655.2 (278.1, 1314.8)	1970.2 (876.5, 4073.3)	200.7 (161.13, 246.41)		2.8 (1.2, 5.7)	3.4 (1.5, 7.1)	21.56 (5.82, 38.62)
Uganda
Incidence	2469.3 (1696.4, 3507.3)	8104.5 (5657.1, 11650.4)	228.21 (189.33, 265.51)		10.9 (7.6, 15.3)	13.1 (9.3, 18.6)	20.67 (6.76, 33.64)
Prevalence	41802.2 (28265.2, 60440.1)	141482.6 (98389.4, 205019.6)	238.46 (196.29, 279.28)		278.3 (189.7, 399.4)	350.7 (241, 503.4)	26.02 (10.91, 40.3)
DALYs	366.1 (153.1, 788.8)	1224.8 (525.7, 2520.4)	234.57 (187.5, 285.57)		2.4 (1, 5.2)	3 (1.3, 6.2)	24.79 (8.21, 42.63)
Zambia
Incidence	1635 (1118.2, 2361.5)	4669.4 (3157.8, 6691.2)	185.59 (150.8, 221.22)		14.5 (9.9, 20.6)	17.4 (11.9, 24.8)	20.36 (6.27, 35.42)
Prevalence	26947 (18043.3, 39502.8)	88097.9 (58546.7, 130205.6)	226.93 (186.22, 270.32)		376.6 (254.4, 546.6)	447.6 (300.1, 653.2)	18.87 (4.43, 34.11)
DALYs	232.3 (97.3, 504.3)	762.4 (326.7, 1594.7)	228.19 (179.68, 282.76)		3.2 (1.4, 7)	3.8 (1.7, 8)	19.77 (3.55, 38.03)
Central Sub-Saharan Africa
Incidence	6063 (4247.4, 8685.3)	23871.9 (16637.7, 33976)	293.73 (259.69, 332.63)		8.8 (6.3, 12.4)	13 (9.2, 18.4)	48.2 (35.82, 62.24
Prevalence	110521.9 (76168.2, 160819.7)	444120.8 (305191.6, 640542)	301.84 (267.24, 341.66)		226.9 (157.8, 329.5)	337.7 (233.3, 485.4)	48.83 (36.5, 63.04)
DALYs	958.3 (406.3, 1975.2)	3861.9 (1673.7, 7930.5)	303.01 (261.05, 353.15)		1.9 (0.8, 4.1)	2.9 (1.3, 6)	49.6 (34.85, 67.72)
Angola
Incidence	1029.1 (707.4, 1467)	6341.6 (4314.3, 9185.3)	516.2 (442.58, 630.71)		8 (5.6, 11.3)	14.5 (9.9, 20.9)	80.32 (59.74, 110.55)
Prevalence	18794.1 (12803.4, 27348)	114150.3 (77525.5, 165941.4)	507.37 (437.23, 620.09)		201.3 (139, 290.7)	385.5 (262.3, 557.4)	91.55 (69.24, 126.29)
DALYs	163.2 (69.6, 328.8)	993.4 (423.2, 2020.5)	508.74 (427.2, 627.15)		1.7 (0.7, 3.5)	3.3 (1.4, 6.8)	91.95 (66.84, 126.06)
Central African Republic
Incidence	348.7 (243.6, 501.3)	824.3 (567.9, 1166.1)	136.39 (115.22, 165.81)		10.4 (7.4, 14.8)	11.3 (7.9, 15.8)	8.51 (-1.02, 20.85)
Prevalence	6845 (4663.1, 10059.4)	15978.9 (10841.5, 23054)	133.44 (112.89, 163.42)		274.7 (188.4, 401.7)	298.4 (203.6, 427.6)	8.66 (-0.93, 21.97)
DALYs	60.2 (25.8, 129.2)	140.6 (60.2, 299.5)	133.47 (104.31, 171.53)		2.4 (1, 5.1)	2.6 (1.1, 5.5)	8.87 (-4.18, 25.77)
Congo
Incidence	369.9 (253.7, 528.1)	1055.7 (725.6, 1508.3)	185.36 (155.55, 221)		11.3 (7.9, 16)	15.5 (10.7, 22.1)	37.24 (23.26, 53.24)
Prevalence	6454 (4368, 9293.9)	22946.7 (15866.2, 32882.5)	255.54 (214.3, 298.77)		291.5 (200.8, 418.6)	403.3 (278, 578.9)	38.37 (23.74, 55.06)
DALYs	55.8 (23.2, 108)	196.5 (86.9, 415.6)	252.34 (205.58, 301.06)		2.5 (1, 4.9)	3.4 (1.5, 7.3)	38.21 (19.49, 55.68)
Democratic Republic of the Congo
Incidence	4109.4 (2853.8, 5955)	14822.3 (10269.8, 21198.9)	260.69 (220.13, 307.69)		8.6 (6, 12.2)	12.3 (8.6, 17.4)	42.52 (26.94, 59.05)
Prevalence	74625.1 (51281.5, 108566.6)	273379 (187214.6, 395201.3)	266.34 (223.97, 317.4)		223.7 (154.5, 325.9)	312.8 (215.4, 451.6)	39.84 (24.07, 58.49)
DALYs	646.1 (271.3, 1321.2)	2378.5 (1034.1, 4884.6)	268.15 (220.74, 332.34)		1.9 (0.8, 4)	2.7 (1.2, 5.6)	40.9 (22.6, 63.71)
Equatorial Guinea
Incidence	49.1 (34.1, 71.2)	385 (262.4, 546.8)	684.19 (587.16, 835.75)		9.4 (6.7, 13.4)	17.6 (12.1, 24.9)	86.34 (62.3, 119.82)
Prevalence	923.1 (631.6, 1364.3)	8049.1 (5441, 11571.3)	771.92 (667.4, 935.02)		256.4 (177.6, 374.3)	505.3 (344.4, 728)	97.11 (73.89, 133.94)
DALYs	8 (3.4, 17.1)	69.7 (30.6, 143.1)	775.06 (656.45, 982.45)		2.2 (0.9, 4.7)	4.3 (1.9, 8.8)	97.49 (70.58, 141.74)
Gabon
Incidence	156.7 (109.2, 224.2)	443 (300, 646.1)	182.69 (145.79, 234.04)		12.7 (8.9, 18.1)	19.6 (13.3, 28.4)	53.75 (34.65, 79.77)
Prevalence	2880.6 (1976.9, 4149.3)	9616.8 (6377.9, 14158.8)	233.85 (190.81, 294.47)		316.8 (218.5, 455.7)	511.8 (339.4, 751.1)	61.55 (41.09, 89.79)
DALYs	25 (10.6, 52.5)	83.1 (35.3, 175.7)	231.92 (186.2, 289.71)		2.7 (1.2, 5.7)	4.4 (1.9, 9.4)	61.16 (40.19, 87.9)
The table shows incident cases,prevalent cases,and Disability-Adjusted Life Years(DALYs) owing to PCOS in 1990 and 2021, and the percentage change, from 1990 to 2021, in the age-standardized rates (ASRs) per 100 000 women (generated from data available from http://ghdx.healthdata.org/gbd-results-tool).UI, uncertainty intervals.
